# Supplementary material for: Muroid rodent phylogenetics: 900-species tree reveals increasing diversification rates
Source: PubMed Central journal article supplement (PMC5559066; doi:10.1371/journal.pone.0183070), 2017-08-16
Supplement: pone.0183070.s001.pdf [file pone.0183070.s001.pdf]

**S1 Appendix. GenBank accession and museum voucher numbers for samples used in phylogenetic analyses.**

| Taxon                                 | Gene                   |              |            |                        |             |                        |
|---------------------------------------|------------------------|--------------|------------|------------------------|-------------|------------------------|
|                                       | <i>Acp5</i>            | <i>BRCA1</i> | <i>GHR</i> | <i>RBP3</i>            | <i>RAG1</i> | <i>cytb</i>            |
| <i>Abeomelomys sevia</i>              | EU349607               | EU349682     | EU349793   | EU349832               | EU349879    | KY753930<br>KU 161033  |
| <i>Abrothrix andinus</i>              | —                      | KC953150     | KC953231   | KC953345               | KC953467    | KY753931<br>MVZ 174066 |
| <i>Abrothrix hershkovitzi</i>         | —                      | —            | —          | —                      | —           | EU840992               |
| <i>Abrothrix jelskii</i>              | —                      | KC953151     | KC953232   | KC953346               | KC953468    | KY753932<br>VPT 1886   |
| <i>Abrothrix lanosus</i>              | —                      | —            | —          | EU683430               | —           | —                      |
| <i>Abrothrix longipilis</i>           | MF110300<br>MVZ 154494 | KC953152     | KC953233   | —                      | KC953469    | EU579470               |
| <i>Abrothrix olivaceus</i>            | MF110301<br>MVZ 182589 | —            | —          | MF097704<br>MVZ 182589 | —           | AF297879               |
| <i>Abrothrix xanthorinus</i>          | —                      | —            | KC953234   | —                      | KC953470    | —                      |
| <i>Acomys cahirinus</i>               | —                      | —            | FN984742   | FN984743               | —           | FJ415482               |
| <i>Acomys chudeaui</i>                | —                      | —            | —          | —                      | —           | FJ415488               |
| <i>Acomys cilicicus</i>               | —                      | —            | —          | —                      | —           | FJ415481               |
| <i>Acomys dimidiatus</i>              | —                      | —            | —          | —                      | —           | Z96062                 |
| <i>Acomys ignitus</i>                 | —                      | AY295008     | AY294923   | KC953348               | AY294951    | JN247674               |
| <i>Acomys johannis</i>                | —                      | —            | —          | —                      | —           | AJ010567               |
| <i>Acomys minous</i> GroupA           | —                      | —            | —          | —                      | —           | AJ233951               |
| <i>Acomys minous</i> GroupB           | —                      | —            | —          | —                      | —           | GU046553               |
| <i>Acomys nesiotus</i>                | —                      | —            | —          | —                      | —           | AJ233952               |
| <i>Acomys perisvalli</i>              | —                      | —            | —          | —                      | —           | KR089012               |
| <i>Acomys russatus</i>                | —                      | —            | FM162071   | FM162053               | —           | Z96066                 |
| <i>Acomys spinosissimus</i>           | —                      | —            | —          | AY326074               | —           | KR089013               |
| <i>Acomys subspinosus</i>             | —                      | —            | —          | —                      | —           | AJ010557               |
| <i>Acomys wilsoni</i>                 | —                      | —            | —          | —                      | —           | AJ010561               |
| <i>Aegialomys galapagoensis</i>       | —                      | —            | —          | EU649039               | —           | EU579478               |
| <i>Aegialomys xanthaeolus</i> Ecuador | —                      | —            | —          | —                      | —           | EU340015               |
| <i>Aegialomys xanthaeolus</i> Peru    | —                      | —            | KC953234   | KC953349               | KC953470    | KY753933<br>MVZ 145540 |
| <i>Aepeomys lugens</i>                | —                      | —            | —          | DQ003722               | —           | —                      |
| <i>Aethomys chrysophilus</i>          | —                      | —            | —          | AY326075               | —           | AJ604515               |
| <i>Aethomys kaiseri</i>               | —                      | —            | —          | —                      | —           | AJ604514               |

|                                  |                         |          |                         |                         |                         |                         |
|----------------------------------|-------------------------|----------|-------------------------|-------------------------|-------------------------|-------------------------|
| <i>Akodon aerosus</i>            | MF110302<br>MVZ 172847  | —        | KC953235                | KC953350                | KC953471                | AKOMTCYTBQ              |
| <i>Akodon affinis</i>            | —                       | —        | —                       | —                       | —                       | AY196164                |
| <i>Akodon albiventer</i>         | —                       | —        | —                       | —                       | —                       | AY494838                |
| <i>Akodon azarae</i>             | MF110303<br>TK 49098    | —        | —                       | MF097705<br>TK 49098    | MF097816<br>TK 49098    | DQ444328                |
| <i>Akodon boliviensis</i>        | MF110304<br>FMNH 162754 | —        | KC953236                | KC953351                | AY294960                | KY753934<br>FMNH 162747 |
| <i>Akodon budini</i>             | —                       | —        | —                       | —                       | —                       | AY605060                |
| <i>Akodon cursor</i>             | MF110305<br>MVZ 182072  | —        | MF074854<br>MVZ 182072  | EF626797                | —                       | EF206814                |
| <i>Akodon dayi</i>               | MF110306<br>USNM 584504 | —        | MF074855<br>USNM 584504 | MF097706<br>USNM 584504 | MF097817<br>USNM 584504 | AY605059                |
| <i>Akodon dolores</i>            | MF110307<br>OMNHN 36058 | —        | MF074856<br>OMNHN 36058 | MF097707<br>OMNHN 36058 | MF097818<br>OMNHN 36058 | AY273904<br>OMNHN 36058 |
| <i>Akodon fumeus</i>             | —                       | —        | MF074857<br>TK 14547    | MF097708 TK<br>14547    | MF097819<br>TK 14547    | AY605061                |
| <i>Akodon glaucinus</i>          | —                       | —        | —                       | —                       | —                       | EU260483                |
| <i>Akodon iniscatus</i>          | MF110308<br>OMNHN 23611 | —        | MF074858<br>OMNHN 23611 | MF097709<br>OMNHN 23611 | MF097820<br>OMNHN 23611 | AY273917                |
| <i>Akodon juninensis</i>         | MF110309<br>MVZ 173038  | —        | —                       | —                       | MF097821<br>MVZ 173038  | AKOMTCYTBH              |
| <i>Akodon kofordi</i>            | MF110310<br>MVZ 171670  | —        | KC953237                | KC953352                | KC953472                | KY753935<br>MVZ 171670  |
| <i>Akodon lindberghi</i>         | —                       | —        | —                       | —                       | —                       | AF184057                |
| <i>Akodon lutescens</i>          | MF110311<br>MVZ 173248  | —        | KC953238                | KC953353                | KC953473                | KY753936<br>MVZ 173248  |
| <i>Akodon mimus</i>              | MF110312<br>MVZ 171752  | KC953153 | KC953239                | AY277425                | KC953474                | M35710                  |
| <i>Akodon molinae</i>            | —                       | —        | —                       | —                       | —                       | AY494839                |
| <i>Akodon mollis</i>             | MF110313<br>TK 104487   | —        | MF074859<br>TK 104487   | MF097710<br>TK 104487   | MF097822<br>TK 104487   | U03546                  |
| <i>Akodon montensis</i>          | MF110314<br>MVZ 197459  | —        | —                       | AY277426                | MF097823<br>MVZ 197459  | AF184055                |
| <i>Akodon mystax</i>             | —                       | —        | —                       | —                       | —                       | AY273907                |
| <i>Akodon orophilus Amazonas</i> | —                       | —        | —                       | —                       | —                       | U03524                  |
| <i>Akodon orophilus Junin</i>    | —                       | —        | —                       | —                       | —                       | KY753937<br>MVZ 173045  |
| <i>Akodon paranaensis</i>        | —                       | —        | —                       | EU649035                | —                       | EF622506                |
| <i>Akodon philipmyersi</i>       | —                       | —        | —                       | —                       | —                       | AY702965                |

|                                  |                         |          |                         |                         |                         |                         |
|----------------------------------|-------------------------|----------|-------------------------|-------------------------|-------------------------|-------------------------|
| <i>Akodon reigi</i>              | —                       | —        | —                       | —                       | —                       | AY195865                |
| <i>Akodon serrensis</i>          | —                       | —        | —                       | AY277429                | —                       | AY273908                |
| <i>Akodon siberiae</i>           | —                       | —        | —                       | AY277430                | —                       | AY273909                |
| <i>Akodon simulator</i>          | MF110315<br>OMNHN 30014 | —        | —                       | —                       | —                       | EU260481                |
| <i>Akodon spegazzinii</i>        | MF110316<br>OMNHN 36501 | —        | —                       | MF097711<br>OMNHN 36501 | MF097824<br>OMNHN 36501 | KY753938<br>OMNHN 36501 |
| <i>Akodon subfuscus</i>          | —                       | —        | —                       | —                       | MF097825<br>LAC 89      | M35695                  |
| <i>Akodon sylvanus</i>           | —                       | —        | —                       | —                       | —                       | DQ683180                |
| <i>Akodon tartareus</i>          | —                       | —        | —                       | —                       | —                       | EU260485                |
| <i>Akodon toba</i>               | MF110317<br>OMNHN 37447 | —        | —                       | AY277433                | MF097826<br>OMNHN 37447 | U03527                  |
| <i>Akodon torques</i>            | MF110318<br>MVZ 171720  | KC953154 | KC953240                | KC953354                | KC953475                | M35700                  |
| <i>Akodon varius</i>             | —                       | —        | —                       | —                       | —                       | EU260478                |
| <i>Allactaga elater</i>          | —                       | —        | —                       | JF835103                | —                       | AJ389534                |
| <i>Allactaga sibirica</i>        | MF110319<br>USNM 449152 | AY294996 | AY294897                | AY326076                | AY241467                | KY753939<br>USNM 449152 |
| <i>Allocricetulus eversmanni</i> | —                       | —        | —                       | —                       | —                       | AJ973378                |
| <i>Alticola argentatus</i>       | —                       | —        | —                       | —                       | —                       | DQ845186                |
| <i>Alticola barakshin</i>        | —                       | —        | —                       | —                       | —                       | DQ845188                |
| <i>Alticola lemminus</i>         | —                       | —        | —                       | —                       | —                       | AF7474                  |
| <i>Alticola macrotis</i>         | —                       | —        | —                       | —                       | —                       | ZINRAS_90980            |
| <i>Alticola semicanus</i>        | —                       | —        | —                       | —                       | —                       | DQ845192                |
| <i>Alticola strelzowi</i>        | —                       | —        | —                       | —                       | —                       | DQ845190                |
| <i>Amphinectomys savamis</i>     | —                       | —        | —                       | AY163579                | —                       | EU579480                |
| <i>Andalgalomys pearsoni</i>     | MF110320<br>MSB 55245   | KC953155 | KC953241                | KC953355                | AY963176                | AF159285                |
| <i>Andalgalomys roigi</i>        | MF110321<br>OMNHN 30015 | —        | MF074860<br>OMNHN 30015 | MF097712<br>OMNHN 30015 | MF097827<br>OMNHN 30015 | KY753940<br>OMNHN 30015 |
| <i>Andinomys edax</i>            | —                       | KC953156 | KC953242                | KC953356                | MF097828<br>FMNH 162759 | AF159284                |
| <i>Anisomys imitator</i>         | DQ023440                | —        | DQ019052                | EU349833                | MF097829<br>SAMA 45107  | KY753941<br>SAMA 45107  |
| <i>Apodemus agrarius</i>         | DQ023441                | EU349658 | DQ019054                | AB096842                | DQ023472                | KY753942<br>MVZ 159220  |
| <i>Apodemus alpicola</i>         | —                       | —        | —                       | AB032861                | —                       | AF159391                |
| <i>Apodemus argenteus</i>        | —                       | —        | —                       | AB032855                | —                       | AB164571                |
| <i>Apodemus chevrieri</i>        | —                       | —        | —                       | AB096847                | —                       | AB096821                |

|                              |             |          |          |             |             |            |
|------------------------------|-------------|----------|----------|-------------|-------------|------------|
| <i>Apodemus draco</i>        | MF110322    | —        | —        | AB109398    | —           | JF503106   |
|                              | USNM 574338 |          |          |             |             |            |
| <i>Apodemus flavicollis</i>  | MF110323    | —        | AM910943 | AB032860    | —           | JF819967   |
|                              | MVZ 181468  |          |          |             |             |            |
| <i>Apodemus gurkha</i>       | —           | —        | —        | AB032859    | —           | AB032852   |
| <i>Apodemus hermonensis</i>  | —           | —        | —        | AB303231    | —           | —          |
| <i>Apodemus latronum</i>     | —           | —        | GU908445 | AB096852    | —           | AM945834   |
| <i>Apodemus mystacinus</i>   | MF110324    | KC953157 | DQ019053 | MF097713    | KC953476    | KY753943   |
|                              | SP 7861     |          |          | SP 7861     |             | SP 7861    |
| <i>Apodemus pallipes</i>     | —           | —        | —        | AB096854    | —           | AF160603   |
| <i>Apodemus peninsulæ</i>    | —           | —        | —        | AB032857    | —           | AB073809   |
| <i>Apodemus semotus</i>      | DQ023442    | —        | DQ019055 | AB032862    | DQ023473    | KY753944   |
|                              |             |          |          |             |             | MVZ 180489 |
| <i>Apodemus speciosus</i>    | —           | —        | AB491493 | AB032856    | —           | AB164486   |
| <i>Apodemus uralensis</i>    | —           | —        | —        | AB096853    | —           | FN430750   |
| <i>Apodemus witherbyi</i>    | —           | —        | —        | AB032863    | KC953477    | KY753945   |
|                              |             |          |          |             |             | MVZ 198798 |
| <i>Apomys abrae</i>          | HM371062    | —        | —        | —           | KM099834    | HM371059   |
| <i>Apomys aurorae</i>        | HM371036    | —        | —        | —           | KM099836    | HM371036   |
| <i>Apomys banahao</i>        | HM371079    | —        | —        | —           | KM099837    | HM371079   |
| <i>Apomys brownorum</i>      | HM371087    | —        | —        | —           | KM099839    | HM371087   |
| <i>Apomys camiguinensis</i>  | AY324476    | —        | —        | —           | KM099841    | AY324477   |
| <i>Apomys datae</i>          | AY324463    | KC953158 | KC878169 | EU349836    | KC953478    | AY324463   |
| <i>Apomys gracilirostris</i> | AY324465    | —        | —        | —           | KM099852    | AY324465   |
| <i>Apomys hylacoetes</i>     | MF110325    | AY295000 | AY294915 | KC953357    | MF097830    | AY324469   |
|                              | FMNH 148149 |          |          |             | FMNH 147871 |            |
| <i>Apomys insignis</i>       | KM099816    | —        | —        | DQ191492    | KM099854    | AY324472   |
| <i>Apomys littoralis</i>     | —           | —        | —        | —           | MF097831    | —          |
|                              |             |          |          |             | FMNH 206109 |            |
| <i>Apomys magnus</i>         | HM371043    | —        | KU375161 | MF097714    | KM099856    | HM371043   |
|                              |             |          |          | FMNH 183570 |             |            |
| <i>Apomys microdon</i>       | MF110326    | —        | —        | DQ191493    | MF097832    | AY324481   |
|                              | FMNH 167241 |          |          |             | FMNH 167241 |            |
| <i>Apomys manganensis</i>    | HM371046    | —        | —        | —           | KM099858    | HM371046   |
| <i>Apomys musculus</i>       | KM099730    | —        | —        | DQ191494    | KM099860    | AY324482   |
| <i>Apomys sacobianus</i>     | KM099817    | —        | —        | —           | KM099861    | KM099818   |
| <i>Apomys sierrae</i>        | HM371011    | —        | —        | —           | MF097833    | HM371011   |
|                              |             |          |          |             | FMNH 191232 |            |
| <i>Apomys zambalensis</i>    | HM371016    | —        | —        | —           | —           | HM371012   |
| <i>Arborimus albipes</i>     | MF110327    | —        | —        | —           | —           | KY753946   |

|                                    |             |          |             |            |             |             |
|------------------------------------|-------------|----------|-------------|------------|-------------|-------------|
|                                    | UWBM 79504  |          |             |            |             | UWBM 79504  |
| <i>Arborimus longicaudus</i>       | —           | —        | MF074861    | MF097715   | —           | KY753947    |
|                                    |             |          | UWBM 78048  | UWBM 78048 |             | UWBM 78048  |
| <i>Archboldomys luzonensis</i>     | AY687857    | EU349675 | EU349794    | EU349837   | DQ023466    | EU349736    |
| <i>Archboldomys maximus</i>        | —           | —        | —           | JQ898078   | —           | JQ898033    |
| <i>Arvicanthus abyssinicus</i>     | —           | —        | —           | —          | —           | AF004566    |
| <i>Arvicanthus nairobae</i>        | —           | —        | —           | —          | MF097834    | KY753948    |
|                                    |             |          |             |            | CN 102433   | CN 102433   |
| <i>Arvicanthus neumanni</i>        | DQ023425    | EU349648 | AY294918    | KC953358   | AY294946    | KY753949    |
|                                    |             |          |             |            |             | H 894       |
| <i>Arvicanthus niloticus</i>       | —           | —        | KC953243    | DQ022386   | —           | AF004570    |
| <i>Arvicola amphibius</i>          | —           | —        | AM392380    | —          | —           | AF119269    |
| <i>Auliscomys pictus</i>           | MF110328    | —        | —           | —          | —           | U03545      |
|                                    | VPT 1882    |          |             |            |             |             |
| <i>Auliscomys sublimis</i>         | MF110329    | KC953159 | KC953244    | KC953359   | AY294965    | U86816      |
|                                    | FMNH 162764 |          |             |            |             |             |
| <i>Baiomys musculus</i>            | —           | —        | KC953245    | KC953360   | KC953479    | AF548481    |
| <i>Baiomys taylori</i>             | MF110330    | —        | EF989740    | AY277408   | —           | AF548477    |
|                                    | MSB 46296   |          |             |            |             |             |
| <i>Bandicota bengalensis</i>       | —           | —        | AM910945    | AM408331   | —           | AM408336    |
| <i>Bandicota indica</i>            | —           | —        | —           | HM217713   | —           | KY753950    |
|                                    |             |          |             |            |             | SAMA 64912  |
| <i>Bandicota savilei</i>           | —           | —        | —           | HM217665   | —           | HM217385    |
| <i>Batomys granti</i>              | DQ023450    | AY295002 | AY294917    | EU349838   | AY241461    | AY324459    |
| <i>Batomys salomonseni</i>         | —           | —        | —           | DQ191497   | —           | DQ191471    |
| <i>Beamys hindei</i>               | —           | AY294998 | AY294904    | AY326077   | MF097835    | KY753951    |
|                                    |             |          |             |            | FMNH 150099 | FMNH 166652 |
| <i>Beamys major</i>                | —           | —        | MF074862    | —          | MF097836    | KY753952    |
|                                    |             |          | FMNH 196215 |            | FMNH 196215 | FMNH 196215 |
| <i>Berylmys berdmorei</i>          | —           | —        | —           | HM217639   | —           | HM217432    |
| <i>Berylmys bowersi</i>            | MF110331    | KC953160 | DQ019056    | KC878201   | DQ023457    | KC878024    |
|                                    | MVZ 186482  |          |             |            |             |             |
| <i>Bibimys chacoensis</i>          | —           | —        | —           | AY277435   | —           | —           |
| <i>Bibimys labiosus</i>            | —           | —        | —           | AY277436   | —           | DQ444329    |
| <i>Blanfordimys bucharensis</i>    | —           | —        | AM392392    | —          | —           | AM392369    |
| <i>Blarinomys breviceps</i> Bahia  | —           | —        | —           | —          | —           | AF108668    |
| <i>Blarinomys breviceps</i> D'Elia | —           | —        | —           | AY277437   | —           | AY275112    |
| <i>Brachiones przewalskii</i>      | —           | —        | —           | —          | —           | AB381903    |
| <i>Brachytarsomys albicauda</i>    | MF110332    | —        | MF074863    | AY326078   | KC953480    | KY753953    |
|                                    | USNM 449351 |          | USNM 449351 |            |             | USNM 449351 |

|                                      |                         |          |                         |                         |                         |                         |
|--------------------------------------|-------------------------|----------|-------------------------|-------------------------|-------------------------|-------------------------|
| <i>Brachytarsomys villosa</i>        | —                       | —        | MF074864<br>AMNH 275216 | MF097716<br>AMNH 275216 | MF097837<br>AMNH 275216 | KY753954<br>AMNH 275216 |
| <i>Brachyuromys betsileoensis</i>    | MF110333<br>USNM 449216 | KC953161 | KC953246                | AY326079                | KC953481                | KY753955<br>USNM 449216 |
| <i>Brachyuromys ramirohitra</i>      | —                       | —        | GQ272594                | —                       | —                       | AF160514                |
| <i>Brucepattersonius igniventris</i> | MF110334<br>MVZ 183250  | KC953162 | KC953247                | AY277438                | KC953482                | KY753956<br>MVZ 183250  |
| <i>Brucepattersonius iheringi</i>    | —                       | —        | —                       | —                       | —                       | AF108667                |
| <i>Brucepattersonius soricinus</i>   | —                       | —        | —                       | AY277439                | —                       | AY277486                |
| <i>Bullimus bagobus</i>              | —                       | —        | GQ405369                | DQ191498                | —                       | DQ191472                |
| <i>Bullimus gamay</i>                | —                       | —        | GQ405370                | DQ191499                | —                       | DQ191473                |
| <i>Bullimus luzonicus</i>            | —                       | —        | GQ405371                | DQ191500                | —                       | DQ191474                |
| <i>Bunomys chrysocomus</i>           | EU349608                | EU349667 | EU349795                | EU349839                | EU349880                | KC878025                |
| <i>Bunomys penitus</i>               | —                       | —        | MF074865<br>MSB 93130   | —                       | MF097838<br>MSB 93130   | KY753957<br>MSB 93130   |
| <i>Calomys callosus</i>              | MF110335<br>MSB 13009   | KC953163 | KC953248                | AY277440                | KC953483                | AF159293                |
| <i>Calomys expulsus</i>              | —                       | —        | —                       | —                       | —                       | DQ447290                |
| <i>Calomys fecundus</i>              | —                       | —        | —                       | —                       | —                       | AY033166                |
| <i>Calomys hummelincki</i>           | —                       | —        | —                       | —                       | —                       | AF385598                |
| <i>Calomys laucha</i>                | MF110336<br>UWBM 72276  | —        | —                       | —                       | —                       | AY964052                |
| <i>Calomys lepidus</i>               | MF110337<br>FMNH 162785 | KC953164 | AY294931                | KC953361                | AY294966                | AF385606                |
| <i>Calomys musculus</i>              | MF110338<br>UWBM 72233  | —        | —                       | —                       | —                       | AF385604                |
| <i>Calomys sorellus</i>              | MF110339<br>MVZ 171542  | —        | —                       | —                       | MF097839<br>MVZ 171542  | KY753958<br>MVZ 171542  |
| <i>Calomys tener</i>                 | —                       | —        | —                       | —                       | —                       | AF385595                |
| <i>Calomys tocaninsi</i>             | —                       | —        | —                       | —                       | —                       | DQ447278                |
| <i>Calomys venustus</i>              | —                       | —        | KC953249                | KC953362                | KC953484                | KY753959<br>PY 13       |
| <i>Calomyscus bailwardi</i>          | —                       | —        | —                       | —                       | —                       | AF160604                |
| <i>Calomyscus baluchi</i>            | —                       | —        | GQ405372                | AY163581                | —                       | EU135586                |
| <i>Calomyscus hotsoni</i>            | —                       | —        | —                       | —                       | —                       | EU135579                |
| <i>Calomyscus</i> sp.                | MF110340<br>MVZ 191923  | KC953165 | AY294901                | —                       | KC953485                | KY753960<br>MVZ 191923  |
| <i>Cannomys badius</i>               | MF110341<br>SAMA 69096  | KC953166 | KC953250                | KC953363                | MF097840<br>SAMA 69096  | KY753961<br>SAMA 69096  |
| <i>Carpomys phaeurus</i>             | —                       | —        | GQ405373                | DQ191501                | —                       | DQ191475                |

|                                 |                         |          |                         |                         |                         |                         |
|---------------------------------|-------------------------|----------|-------------------------|-------------------------|-------------------------|-------------------------|
| <i>Cerradomys maracajuensis</i> | MF110342<br>USNM 584575 | —        | —                       | —                       | —                       | AF181278                |
| <i>Cerradomys marinhos</i>      | —                       | —        | —                       | —                       | —                       | AF181279                |
| <i>Cerradomys scotti</i>        | MF110343<br>USNM 584584 | —        | —                       | EU649040                | —                       | EU579482                |
| <i>Cerradomys subflavus</i>     | MF110344<br>MVZ 197868  | —        | KC953251                | MF097717<br>MVZ 197868  | KC953486                | AF181274                |
| <i>Chelemys macronyx</i>        | MF110345<br>MVZ 155800  | —        | KC953252                | AY277441                | —                       | U03533                  |
| <i>Chilomys instans</i>         | —                       | —        | —                       | —                       | —                       | AF108679                |
| <i>Chinchillula sahamae</i>     | MF110346<br>VPT 1825    | —        | —                       | KC953364                | KC953487                | —                       |
| <i>Chionomys nivalis</i>        | —                       | —        | AM392378                | AM919424                | —                       | AY513845                |
| <i>Chiromyscus chiropus</i>     | EU349609                | EU349665 | EU349796                | EU349840                | EU349881                | KY753962<br>SAMA 69097  |
| <i>Chiropodomys gliroides</i>   | MF110347<br>AMCC 101587 | EU349674 | EU349797                | EU349841                | EU349882                | KY753963<br>AMCC 101511 |
| <i>Chiruromys vates</i>         | MF110348<br>KU 160658   | —        | —                       | KC953365                | EU349883                | EU349741                |
| <i>Chrotomys gonzalesi</i>      | AY324461                | —        | AY294943                | EU349843                | EU349884                | EU349742                |
| <i>Chrotomys mindorensis</i>    | —                       | —        | —                       | JQ898073                | —                       | —                       |
| <i>Chrotomys sibuyanensis</i>   | —                       | —        | GQ405376                | DQ191504                | —                       | AY687862                |
| <i>Chrotomys silaceus</i>       | —                       | —        | GQ405377                | DQ191502                | —                       | AY687859                |
| <i>Chrotomys whiteheadi</i>     | —                       | —        | —                       | JQ898074                | —                       | AY687864                |
| <i>Colomys goslingi</i>         | MF110349<br>CN 102451   | —        | MF074866<br>CN 102451   | MF097718<br>CN 102451   | MF097841<br>CN 102451   | KY753964<br>CN 102451   |
| <i>Conilurus penicillatus</i>   | —                       | EU349694 | DQ019057                | EU349844                | DQ023467                | SAMA 7411               |
| <i>Crateromys heaneyi</i>       | —                       | —        | GQ405378                | DQ191505                | —                       | DQ191476                |
| <i>Cremnomys cutchicus</i>      | —                       | —        | —                       | DQ022384                | —                       | DQ022381                |
| <i>Cricetomys emini</i>         | MF110350<br>FMNH 160394 | —        | —                       | AY326081                | —                       | KY753965<br>FMNH 160394 |
| <i>Cricetomys gambianus</i>     | MF110351<br>FMNH 166654 | KC953167 | AY294905                | KC953366                | AY294936                | KY753966<br>FMNH 166654 |
| <i>Cricetulus barabensis</i>    | —                       | —        | —                       | —                       | —                       | AJ973384                |
| <i>Cricetulus griseus</i>       | —                       | —        | —                       | AB033705                | AY011885                | AB033693                |
| <i>Cricetulus kamensis</i>      | MF110352<br>USNM 449165 | —        | MF074867<br>USNM 449165 | MF097719<br>USNM 449165 | MF097842<br>USNM 449165 | KY753967<br>USNM 449165 |
| <i>Cricetulus longicaudatus</i> | —                       | —        | —                       | AY326082                | —                       | AJ973386                |
| <i>Cricetulus migratorius</i>   | MF110353<br>MVZ 191941  | —        | AY294926                | KC953367                | AY294956                | KY753968<br>MVZ 191941  |

|                                  |                         |          |                        |                       |                        |                         |
|----------------------------------|-------------------------|----------|------------------------|-----------------------|------------------------|-------------------------|
| <i>Cricetus cricetus</i>         | KR088976                | KC953168 | KC953253               | AY277410              | KC953488               | KR089014                |
| <i>Crunomys melanius</i>         | —                       | —        | GQ405379               | DQ191506              | —                      | DQ191477                |
| <i>Crunomys suncoides</i>        | —                       | —        | —                      | DQ191507              | —                      | DQ191478                |
| <i>Dacnomys millardi</i>         | MF110354<br>MVZ 186519  | KC953169 | DQ019058               | KC878206              | MF097843<br>MVZ 186519 | KC878029                |
| <i>Dasymys incomtus</i>          | MF110355<br>SAMA 65735  | EU349653 | EU349798               | KC878207              | DQ023459               | AF141217                |
| <i>Dasymys rufulus</i>           | —                       | —        | —                      | DQ022387              | —                      | AF141216                |
| <i>Delanymys brooksi</i>         | MF110356<br>FMNH 157490 | KC953170 | KC953254               | KC953368              | KC953490               | KY753969<br>FMNH 157490 |
| <i>Delomys collinus</i>          | —                       | —        | —                      | —                     | —                      | AF181282                |
| <i>Delomys dorsalis</i>          | MF110357<br>MVZ 182789  | —        | KC953255               | KC953369              | KC953491               | AF108686                |
| <i>Delomys sublineatus</i>       | —                       | —        | —                      | AY277443              | —                      | AF108687                |
| <i>Deltamys kempii</i>           | —                       | —        | —                      | AY277444              | —                      | AY195860                |
| <i>Dendromus insignis</i>        | MF110358<br>FMNH 144355 | —        | KC953256               | KC953370              | KC953492               | KY753970<br>FMNH 190313 |
| <i>Dendromus mesomelas</i>       | MF110359<br>FMNH 161269 | AY294997 | AY294902               | KC953371              | AY241458               | KY753971<br>FMNH153931  |
| <i>Dendromus mystacalis</i>      | —                       | —        | MF074868<br>SAMA 65832 | —                     | —                      | KY753972<br>SAMA 65832  |
| <i>Dendromus nyasae</i>          | —                       | —        | KC953257               | KC953372              | KC953493               | KY753973<br>FMNH 138122 |
| <i>Dendromus nyikae</i>          | —                       | —        | —                      | AY326083              | —                      | —                       |
| <i>Deomys ferrugineus</i>        | —                       | AY295007 | AY294922               | KC953373              | AY241460               | EU349745                |
| <i>Dephomyia defua</i>           | —                       | —        | —                      | MF097720<br>CN 100487 | —                      | KY753974<br>CN 100487   |
| <i>Desmodilliscus braueri</i>    | —                       | —        | —                      | FN357289              | —                      | AJ851273                |
| <i>Desmodillus auricularis</i>   | KR088977                | KC953171 | DQ019048               | KC953374              | KC953494               | KR089015                |
| <i>Desmomys harringtoni</i>      | —                       | —        | —                      | EU292144              | —                      | AF141206                |
| <i>Dicrostonyx groenlandicus</i> | —                       | —        | —                      | —                     | —                      | AF119268                |
| <i>Dicrostonyx hudsonius</i>     | MF110360<br>CN 96670    | —        | MF074869<br>CN 96670   | MF097721<br>CN 96670  | MF097844<br>CN 96670   | KY753975<br>CN 96670    |
| <i>Dicrostonyx torquatus</i>     | —                       | —        | AM392381               | —                     | —                      | —                       |
| <i>Dinaromys bogdanovi</i>       | —                       | —        | —                      | —                     | —                      | EU190891                |
| <i>Diplothrix legata</i>         | EU349612                | EU349670 | EU349799               | AB033706              | EU349885               | KY753976<br>HS 1163     |
| <i>Dipodillus campestris</i>     | KR088978                | —        | KR089038               | —                     | KR089045               | KR089016                |



|                                  |                         |   |                         |                         |                         |                         |
|----------------------------------|-------------------------|---|-------------------------|-------------------------|-------------------------|-------------------------|
| <i>Dipodillus dasyurus</i>       | KR088979                | — | KR089039                | MF097722<br>TK 25570    | KR089046                | KR089017                |
| <i>Dipodillus simoni</i>         | KR088980                | — | KR089040                | —                       | —                       | GU356579                |
| <i>Dipus sagitta</i>             | —                       | — | AM407908                | AJ427232                | —                       | AM407909                |
| <i>Drymoreomys albimaculatus</i> | —                       | — | —                       | EU649042                | —                       | EU579487                |
| <i>Eligmodontia bolsonensis</i>  | —                       | — | —                       | —                       | —                       | EU377644                |
| <i>Eligmodontia hirtipes</i>     | —                       | — | —                       | —                       | —                       | EU377632                |
| <i>Eligmodontia moreni</i>       | MF110361<br>OMNHN 34610 | — | MF074873<br>OMNHN 34610 | MF097723<br>OMNHN 34610 | MF097845<br>OMNHN 34610 |                         |
| <i>Eligmodontia morgani</i>      | MF110362<br>MVZ 182670  | — | —                       | —                       | —                       | AF108691                |
| <i>Eligmodontia puerulus</i>     | MF110363<br>OMNHN 34746 | — | MF074874<br>OMNHN 34746 | MF097724<br>OMNHN 34746 | MF097846<br>OMNHN 34746 | EU377652                |
| <i>Eligmodontia typus</i>        | —                       | — | —                       | AY277445                | —                       | EU377610                |
| <i>Eliurus antsingy</i>          | —                       | — | —                       | —                       | —                       | HM223711                |
| <i>Eliurus carletoni</i>         | —                       | — | —                       | HM223845                | —                       | HM223602                |
| <i>Eliurus ellermani</i>         | —                       | — | —                       | —                       | —                       | AF160573                |
| <i>Eliurus grandidieri</i>       | MF110364<br>AMNH 275218 | — | —                       | MF097725<br>AMNH 275218 | MF097847<br>AMNH 275218 | KY753977<br>AMNH 275218 |
| <i>Eliurus majori</i>            | —                       | — | —                       | HM223872                | —                       | AF160550                |
| <i>Eliurus minor</i>             | —                       | — | —                       | HM223876                | —                       | AF160540                |
| <i>Eliurus myoxinus</i>          | MF110365<br>AMNH 275399 | — | —                       | AY326085                | MF097848<br>AMNH 275399 | KY753978<br>AMNH 275399 |
| <i>Eliurus tanala</i>            | MF110366<br>USNM 448908 | — | KC953258                | KC953375                | KC953497                | KY753979<br>USNM 448908 |
| <i>Eliurus webbi</i>             | —                       | — | MF074875<br>MVZ 216998  | MF097726<br>MVZ 216998  | MF097849<br>MVZ 216998  | KY753980<br>MVZ 216998  |
| <i>Ellobius talpinus</i>         | MF110367<br>RA          | — | GQ142005                | —                       | —                       | —                       |
| <i>Ellobius tancrei</i>          | —                       | — | GQ142006                | —                       | —                       | AF119270                |
| <i>Eolagurus luteus</i>          | —                       | — | GQ142004                | —                       | —                       | —                       |
| <i>Eospalax cansus</i>           | —                       | — | —                       | —                       | —                       | EF522072                |
| <i>Eospalax rufescens</i>        | —                       | — | —                       | —                       | —                       | FJ571147                |
| <i>Eospalax smithii</i>          | —                       | — | —                       | —                       | —                       | EF522064                |
| <i>Eothenomys chinensis</i>      | —                       | — | GQ374497                | —                       | —                       | HM165437                |
| <i>Eothenomys custos</i>         | —                       | — | —                       | —                       | MF097850<br>UWBM 75296  | AY426676                |
| <i>Eothenomys eva</i>            | —                       | — | —                       | —                       | —                       | HM165401                |
| <i>Eothenomys hintoni</i>        | —                       | — | —                       | —                       | —                       | HM165407                |
| <i>Eothenomys inez</i>           | —                       | — | —                       | —                       | —                       | HM165386                |

|                                                 |                        |          |                        |                        |                        |                        |
|-------------------------------------------------|------------------------|----------|------------------------|------------------------|------------------------|------------------------|
| <i>Eothenomys melanogaster</i><br>mainland Asia | —                      | —        | —                      | AY163583               | —                      | HM165396               |
| <i>Eothenomys melanogaster</i><br>Taiwan        | MF110368<br>MVZ 180931 | —        | MF074876<br>MVZ 180931 | MF097727<br>MVZ 180931 | MF097851<br>MVZ 180931 | KY753981<br>MVZ180931  |
| <i>Eothenomys miletus</i>                       | MF110369<br>CAS 29092  | —        | —                      | —                      | MF097852<br>CAS 29092  | HM165442               |
| <i>Eothenomys olitor</i>                        | —                      | —        | —                      | —                      | —                      | AY426688               |
| <i>Eothenomys proditor</i>                      | —                      | —        | —                      | —                      | —                      | KY753982<br>UWBM 75296 |
| <i>Eothenomys</i> sp. 1                         | —                      | —        | —                      | —                      | —                      | KY753983<br>CAS_27963  |
| <i>Eothenomys</i> sp. 2                         | MF110370<br>UWBM 75247 | —        | —                      | MF097728<br>UWBM 75247 | MF097853<br>UWBM 75247 | KY753984<br>UWBM 75284 |
| <i>Eothenomys tarquinius</i>                    | —                      | —        | —                      | —                      | —                      | HM165398               |
| <i>Eremoryzomys polius</i>                      | —                      | —        | —                      | AY163624               | —                      | EU579483               |
| <i>Euchoreutes naso</i>                         | —                      | —        | —                      | JF835099               | —                      | —                      |
| <i>Euneomys chinchilloides</i>                  | MF110371<br>LB 018     | KC953172 | KC953259               | MF097729<br>LB 018     | KC953498               | AY275115               |
| <i>Euneomys mordax</i>                          | MF110372<br>MVZ 202625 | —        | —                      | —                      | —                      | KY753985<br>MVZ 202625 |
| <i>Euryoryzomys emmonsae</i>                    | —                      | —        | MF074877<br>MVZ 197524 | MF097730<br>MVZ 197524 | MF097854<br>MVZ 197524 | AF251526               |
| <i>Euryoryzomys lamia</i>                       | —                      | —        | —                      | AY163619               | —                      | —                      |
| <i>Euryoryzomys macconnelli</i>                 | —                      | —        | —                      | AY163620               | MF097855<br>MVZ 190450 | KY753986<br>MVZ 190450 |
| <i>Euryoryzomys nitidus</i>                     | MF110373<br>TK 14571   | —        | MF074878<br>TK 14571   | MF097731<br>TK 14571   | MF097856<br>TK 14571   | KY753987<br>TK 14571   |
| <i>Euryoryzomys russatus</i>                    | —                      | —        | —                      | AY163625               | —                      | KY753988<br>MVZ 192977 |
| <i>Geoxus valdivianus</i>                       | MF110374<br>MVZ 154601 | KC953173 | KC953260               | MF097732<br>MVZ 154601 | KC953499               | AY275116               |
| <i>Gerbilliscus afra</i>                        | —                      | —        | —                      | —                      | —                      | AJ430560               |
| <i>Gerbilliscus brantsii</i>                    | —                      | —        | —                      | —                      | —                      | AM409392               |
| <i>Gerbilliscus gambiana</i>                    | —                      | —        | —                      | —                      | —                      | AM409386               |
| <i>Gerbilliscus guineae</i>                     | —                      | —        | —                      | —                      | —                      | AM409379               |
| <i>Gerbilliscus kempfi</i>                      | —                      | —        | —                      | —                      | —                      | AM409384               |
| <i>Gerbilliscus leucogaster</i>                 | —                      | —        | —                      | KR089043               | —                      | AJ851260               |
| <i>Gerbilliscus nigricaudus</i>                 | —                      | —        | —                      | —                      | —                      | AM409378               |
| <i>Gerbilliscus robustus</i>                    | KR088982               | AY295005 | AY294920               | AY326113               | KC953587               | KR089018               |
| <i>Gerbilliscus validus</i>                     | —                      | —        | —                      | —                      | —                      | Z96044                 |

|                              |                         |          |                       |                       |                       |                                |
|------------------------------|-------------------------|----------|-----------------------|-----------------------|-----------------------|--------------------------------|
| <i>Gerbillurus paeba</i>     | —                       | —        | KC953261              | KC953376              | KC953500              | KR089019                       |
| <i>Gerbillurus setzeri</i>   | KR088983                | —        | KR089042              | KR089044              | KR089048              | KR089020                       |
| <i>Gerbillurus tytonis</i>   | KR088984                | —        | —                     | —                     | —                     | KR089021                       |
| <i>Gerbillurus vallinus</i>  | KR088985                | EU349643 | AF332022              | KC953377              | AY294948              | KR089022                       |
| <i>Gerbillus gerbillus</i>   | KR088986                | EU349700 | DQ019049              | EU349846              | DQ023452              | KR089023                       |
| <i>Gerbillus latastei</i>    | —                       | —        | —                     | —                     | —                     | GU356550                       |
| <i>Gerbillus nanus</i>       | KR088987                | —        | KC953262              | KC953378              | KC953501              | —                              |
| <i>Gerbillus nigeriae</i>    | —                       | —        | —                     | AM408333              | —                     | AJ430555                       |
| <i>Gerbillus tarabuli</i>    | —                       | —        | —                     | —                     | —                     | GU356571                       |
| <i>Golunda ellioti</i>       | —                       | —        | AM910951              | AM408332              | —                     | AM408338                       |
| <i>Grammomys cometes</i>     | —                       | —        | —                     | —                     | —                     | EU275248                       |
| <i>Grammomys dolichurus</i>  | —                       | —        | EU349803              | KC953379              | KC953502              | EU275253                       |
| <i>Grammomys gazellae</i>    | —                       | —        | —                     | AM408329              | —                     | AM408345                       |
| <i>Grammomys ibeanus</i>     | EU349614                | KC953174 | EU349801              | KC953380              | KC953503              | KY753989                       |
| <i>Grammomys macmillani</i>  | EU349615                | KC953175 | EU349802              | EU349848              | EU349888              | FMNH 151236<br>KY753990        |
| <i>Grammomys surdaster</i>   | EU349616                | —        | —                     | —                     | —                     | FMNH 155381<br>KY753991        |
| <i>Graomys centralis</i>     | MF110375<br>PY 06       | —        | KC953263              | KC953381              | KC953504              | CM 102656<br>KY753992<br>PY 07 |
| <i>Graomys chacoensis</i>    | —                       | —        | —                     | —                     | —                     | FJ573153                       |
| <i>Graomys domorum</i>       | MF110376<br>MSB 55291   | —        | —                     | MF097733<br>MSB 55291 | —                     | AF159291                       |
| <i>Graomys griseoflavus</i>  | MF110377<br>PY 03       | KC953176 | KC953264              | AY277449              | AY963181              | KY753993<br>UP 110             |
| <i>Gymnuromys roberti</i>    | MF110378<br>USNM 449001 | KC953177 | AY294909              | AY326087              | KC953505              | KY753994<br>USNM 449001        |
| <i>Habromys chinanteco</i>   | —                       | —        | —                     | —                     | —                     | DQ861380                       |
| <i>Habromys delicatulus</i>  | —                       | —        | —                     | —                     | —                     | DQ861399                       |
| <i>Habromys ixtlani</i>      | —                       | —        | EF989832              | EF989842              | —                     | —                              |
| <i>Habromys lepturus</i>     | MF110379<br>ROM 29849   | KC953178 | KC953265              | EF989841              | KC953506              | KY753995<br>ROM 29849          |
| <i>Habromys lophurus</i>     | —                       | —        | EF989745              | EF989845              | —                     | EF989944                       |
| <i>Handleyomys alfaroi</i>   | MF110380<br>TK 136066   | —        | MF074879<br>TK 136066 | MF097734<br>TK 136066 | MF097857<br>TK 136066 | KY753996<br>TK 136066          |
| <i>Handleyomys intectus</i>  | —                       | —        | —                     | AY163584              | —                     | EU579490                       |
| <i>Handleyomys melanotis</i> | MF110381                | —        | MF074880              | MF097735              | MF097858              | —                              |

|                                |                       |          |                       |                       |                       |             |
|--------------------------------|-----------------------|----------|-----------------------|-----------------------|-----------------------|-------------|
| <i>Handleyomys rostratus</i>   | TK 101719<br>MF110382 | —        | TK 101719<br>MF074881 | TK 101719<br>MF097736 | TK 101719<br>MF097859 | EU579493    |
| <i>Handleyomys saturator</i>   | TK 113553<br>MF110383 | —        | TK 113553<br>MF074882 | TK 113553<br>MF097737 | TK 113553<br>MF097860 | KY753997    |
| <i>Hapalomys delacouri</i>     | TK 113513             | —        | TK 113513             | TK 113513             | TK 113513             | TK 113513   |
| <i>Heimyscus fumosus</i>       | —                     | —        | —                     | MF097738              | MF097861              | KY753998    |
| <i>Hodomys alleni</i>          | —                     | —        | AM910953              | CM 116069             | CM 116069             | CM 116069   |
|                                | MF110384              | KC953179 | KC953266              | DQ022397              | —                     | AF518333    |
|                                | 2744 GOS              | —        | —                     | MF097739              | MF097862              | DQ179810    |
| <i>Holochilus brasiliensis</i> | —                     | —        | —                     | 2744 GOS              | 2744 GOS              | —           |
| <i>Holochilus charcarius</i>   | —                     | —        | —                     | EU273418              | —                     | EU579495    |
|                                | —                     | —        | MF074883              | MF097740              | MF097863              | KY753999    |
| <i>Holochilus sciureus</i>     | MF110385              | —        | OMNHN 23525           | OMNHN 23525           | OMNHN 23525           | OMNHN 23525 |
|                                | MVZ 193733            | —        | KC953267              | KC953382              | KC953507              | AF108697    |
| <i>Hybomys lunaris</i>         | —                     | —        | —                     | —                     | —                     | DQ902763    |
| <i>Hybomys univittatus</i>     | MF110386              | KC953181 | DQ019059              | KC953383              | KC953508              | KY754000    |
|                                | CM 108044             | —        | —                     | —                     | —                     | CM 108044   |
| <i>Hydromys chrysogaster</i>   | EU349618              | EU349699 | EU349804              | EU349849              | EU349890              | KY754001    |
|                                | —                     | —        | —                     | —                     | —                     | KU 160730   |
| <i>Hylaeamys acritus</i>       | MF110387              | —        | —                     | —                     | MF097864              | AY940623    |
|                                | USNM 597572           | —        | —                     | —                     | USNM 597572           | —           |
| <i>Hylaeamys laticeps</i>      | MF110388              | —        | MF074884              | EU649050              | MF097865              | EU579498    |
|                                | MVZ 197606            | —        | MVZ 197606            | —                     | MVZ 197606            | —           |
| <i>Hylaeamys megacephalus</i>  | MF110389              | —        | MF074885              | MF097741              | MF097866              | KY754002    |
|                                | MVZ 197525            | —        | AMNH 257234           | AMNH 257234           | AMNH 25723            | AMNH 25723  |
| <i>Hylaeamys perenensis</i>    | —                     | —        | —                     | EU649051              | —                     | KY754003    |
|                                | —                     | —        | —                     | —                     | —                     | MVZ 166676  |
| <i>Hylaeamys yunganus</i>      | MF110390              | —        | MF074886              | MF097742              | MF097867              | KY754004    |
|                                | TK 73788              | —        | TK 73788              | TK 73788              | TK 73788              | TK 73788    |
| <i>Hylomyscus aeta</i>         | —                     | —        | —                     | —                     | —                     | DQ078241    |
| <i>Hylomyscus alleni</i>       | MF110391              | —        | —                     | —                     | MF097868              | AY057817    |
|                                | CM 108090             | —        | —                     | —                     | CM 108090             | —           |
| <i>Hylomyscus baeri</i>        | —                     | —        | —                     | —                     | —                     | DQ078244    |
| <i>Hylomyscus denniae</i>      | —                     | —        | —                     | AY326088              | —                     | DQ902733    |
| <i>Hylomyscus pamfi</i>        | —                     | —        | —                     | —                     | —                     | HM013771    |
| <i>Hylomyscus parvus</i>       | MF110392              | —        | MF074887              | DQ022399              | DQ023479              | CM 108105   |
|                                | CM 108106             | —        | CM 108105             | —                     | —                     | —           |
| <i>Hylomyscus simus</i>        | —                     | —        | —                     | —                     | —                     | DQ212188    |
| <i>Hylomyscus stella</i>       | —                     | —        | AM910955              | MF097743              | MF097869              | CM 102459   |

|                                |                         |          |                         |                         |                                     |                         |
|--------------------------------|-------------------------|----------|-------------------------|-------------------------|-------------------------------------|-------------------------|
| <i>Hyomys goliath</i>          | MF110393<br>SAMA 42697  | EU349679 | EU349805                | CM 102459<br>KC953384   | CM 102459<br>MF097870<br>SAMA 42697 | KY754005<br>SAMA 42697  |
| <i>Hypogeomys antimena</i>     | MF110394<br>MOR 149     | —        | AY294907                | AY326089                | KC953509                            | KY754006<br>MOR 149     |
| <i>Ichthyomys stolzmanni</i>   | —                       | —        | —                       | MF097744<br>MUSM 25807  | —                                   | —                       |
| <i>Irenomys tarsalis</i>       | —                       | KC953182 | KC953268                | MF097745<br>MVZ 155839  | AY294962                            | U03534                  |
| <i>Isthomys pirrensis</i>      | MF110395<br>LSUMZ 25441 | —        | MF074888<br>LSUMZ 25441 | MF097746<br>LSUMZ 25441 | —                                   | KY754007<br>LSUMZ 25441 |
| <i>Jaculus jaculus</i>         | —                       | —        | AF332040                | AM407907                | JN414964                            | KY754008                |
| <i>Juliomys ossitenuis</i>     | —                       | —        | —                       | —                       | —                                   | AF108689                |
| <i>Juliomys pictipes</i>       | MF110396<br>MVZ 182079  | KC953183 | KC953269                | KC953385                | KC953510                            | AF108688                |
| <i>Juliomys rimofrons</i>      | —                       | —        | —                       | —                       | —                                   | AY029476                |
| <i>Juscelinomys huanchacae</i> | MF110397<br>USNM 584508 | —        | —                       | AY277452                | MF097871<br>USNM 584508             | KY754009<br>USNM 584508 |
| <i>Kunsia tomentosus</i>       | MF110398<br>USNM 584516 | —        | —                       | KC953386                | KC953511                            | AF108670                |
| <i>Lagurus lagurus</i>         | —                       | —        | GQ142003                | —                       | —                                   | AF429818                |
| <i>Lasiopodomys brandtii</i>   | —                       | —        | GQ374498                | JF906134                | —                                   | BS0235                  |
| <i>Lasiopodomys mandarinus</i> | —                       | —        | AM392396                | AM919413                | —                                   | FJ986322                |
| <i>Leggadina forresti</i>      | DQ023437                | EU349686 | DQ019061                | EU349850                | DQ023468                            | EU349751                |
| <i>Lemmiscus curtatus</i>      | MF110399<br>MVZ 208364  | —        | —                       | —                       | —                                   | KY754010<br>MVZ 208364  |
| <i>Lemmus lemmus</i>           | —                       | —        | —                       | —                       | —                                   | AY219145                |
| <i>Lemmus sibiricus</i>        | MF110400<br>UWBM 39305  | —        | MF074889<br>UWBM 39305  | MF097747<br>UWBM 39305  | MF097872<br>UWBM 39305              | KY754011<br>UWBM 39305  |
| <i>Lemniscomys barbarus</i>    | MF110401<br>CM 102462   | KC953184 | DQ019062                | KC953387                | DQ023461                            | KY754012<br>CM 102463   |
| <i>Lemniscomys bellieri</i>    | —                       | —        | —                       | —                       | —                                   | AF004586                |
| <i>Lemniscomys macculus</i>    | —                       | —        | —                       | —                       | —                                   | AF141208                |
| <i>Lemniscomys rosalia</i>     | —                       | —        | —                       | DQ022390                | —                                   | AF141209                |
| <i>Lemniscomys striatus</i>    | —                       | —        | AM910956                | AM408321                | —                                   | AF141211                |
| <i>Lemniscomys zebra</i>       | —                       | —        | —                       | —                       | —                                   | AF141207                |
| <i>Lenoxus apicalis</i>        | MF110402<br>MVZ 171512  | KC953185 | KC953270                | KC953388                | KC953512                            | U03541                  |
| <i>Leopoldamys edwardsi</i>    | MF110403<br>MVZ 186501  | —        | —                       | HM217687                | MF097873<br>MVZ 186501              | KY754013<br>MVZ 186501  |

|                               |                |          |            |            |            |             |
|-------------------------------|----------------|----------|------------|------------|------------|-------------|
| <i>Leopoldamys neilli</i>     | —              | —        | —          | HM217697   | —          | HM217460    |
| <i>Leopoldamys sabanus</i>    | MF110404       | KC953186 | DQ019063   | KC878208   | KC953513   | KC878030    |
|                               | RA Leopoldamys |          |            |            |            |             |
| <i>Leporillus conditor</i>    | DQ070376       | EU349692 | EU349806   | MF097748   | MF097874   | KY754014    |
|                               |                |          |            | SAMA 13335 | SAMA 13335 | SAMA 13335  |
| <i>Leptomys elegans</i>       | EU349619       | EU349697 | EU349807   | MF097749   | EU349893   | KY754015    |
|                               |                |          |            | SAMA 45741 |            | SAMA 45741  |
| <i>Limnomys bryophilus</i>    | —              | —        | GQ405380   | DQ191508   | —          | DQ191479    |
| <i>Limnomys sibuanus</i>      | —              | —        | GQ405381   | DQ191509   | —          | DQ191480    |
| <i>Lophiomys imhausi</i>      | KR088988       | —        | —          | KC953389   | KC953514   | KR089025    |
| <i>Lophuromys aquilus</i>     | —              | AY295006 | AY294921   | AY326091   | AY294950   | KY754016    |
|                               |                |          |            |            |            | FMNH 144777 |
| <i>Lophuromys brevicaudus</i> | —              | —        | —          | —          | —          | AY828232    |
| <i>Lophuromys chrysopus</i>   | —              | —        | —          | —          | —          | AY828269    |
| <i>Lophuromys melanonyx</i>   | —              | —        | —          | —          | —          | AY828235    |
| <i>Lophuromys sikapusi</i>    | —              | —        | KC953271   | KC953390   | KC953515   | KR089026    |
| <i>Lophuromys woosnami</i>    | —              | —        | —          | —          | —          | DQ902807    |
| <i>Lophuromys zena</i>        | —              | —        | KC953272   | KC953391   | KC953516   | KR089027    |
| <i>Lorentzimys nouhuysi</i>   | —              | EU349680 | EU349808   | KC953392   | EU349894   | KY754017    |
|                               |                |          |            |            |            | SAMA 42732  |
| <i>Loxodontomys micropus</i>  | MF110405       | —        | KC953273   | AY277457   | AY963183   | AY275122    |
|                               | EUP 001        |          |            |            |            |             |
| <i>Lundomys molitor</i>       | —              | —        | —          | AY163589   | —          | EU579501    |
| <i>Macrotarsomys bastardi</i> | —              | —        | GQ272597   | AY326092   | —          | EU497642    |
| <i>Macruromys major</i>       | EU349620       | EU349678 | MF074890   | MF097750   | EU349895   | KY754018    |
|                               |                |          | SAMA 43909 | SAMA 43909 |            | SAMA 43909  |
| <i>Malacomys cansdalei</i>    | —              | —        | MF074891   | —          | MF097875   | KY754019    |
|                               |                |          | CM 100502  |            | CM 100502  | CM 100502   |
| <i>Malacomys edwardsi</i>     | —              | —        | AM910958   | —          | —          | —           |
| <i>Malacomys longipes</i>     | DQ023443       | EU349656 | DQ019064   | DQ022393   | DQ023474   | KY754020    |
|                               |                |          |            |            |            | CM 108118   |
| <i>Malacothrix typica</i>     | MF110406       | KC953186 | AY294903   | KC953393   | KC953517   | KY754021    |
|                               | TM 39370       |          |            |            |            | TM 39370    |
| <i>Mallomys rothschildi</i>   | EU349621       | EU349681 | EU349810   | MF097751   | EU349896   | KY754022    |
|                               |                |          |            | SAMA 47402 |            | SAMA 47402  |
| <i>Mammelomys lanosus</i>     | EU349622       | KC953188 | EU349811   | MF097752   | EU349897   | KY754023    |
|                               |                |          |            | SAMA 47208 |            | SAMA 47208  |
| <i>Margaretamys elegans</i>   | MF110407       | —        | KC953274   | KC953394   | KC953518   | —           |
|                               | MSB 93144      |          |            |            |            |             |
| <i>Mastacomys fuscus</i>      | DQ070378       | EU349687 | EU349812   | MF097753   | EU349898   | KY754024    |

|                                  |                         |          |                         |                                    |                         |                                    |
|----------------------------------|-------------------------|----------|-------------------------|------------------------------------|-------------------------|------------------------------------|
| <i>Mastomys coucha</i>           | —                       | —        | MF074892<br>CM 95050    | SAMA 07354<br>MF097754<br>CM 95050 | MF097876<br>CM 95050    | SAMA 07354<br>KY754025<br>CM 95050 |
| <i>Mastomys erythroleucus</i>    | —                       | KC953189 | AM910959                | KC878210                           | KC953519                | KY754026<br>SAMA 65697             |
| <i>Mastomys hildebrandti</i>     | —                       | AY295001 | AY294916                | —                                  | KC953520                | —                                  |
| <i>Mastomys huberti</i>          | —                       | —        | —                       | —                                  | —                       | AF141220                           |
| <i>Mastomys kollmannspergeri</i> | —                       | —        | AM910961                | —                                  | —                       | HM635903                           |
| <i>Mastomys natalensis</i>       | DQ070384                | —        | —                       | MF097755<br>FMNH 166943            | —                       | KY754027<br>FMNH 166943            |
| <i>Mastomys pernanus</i>         | —                       | —        | AM910960                | DQ022403                           | —                       | AF518343                           |
| <i>Mastomys verheyeni</i>        | —                       | —        | —                       | DQ022402                           | —                       | —                                  |
| <i>Maxomys bartelsii</i>         | DQ023423                | EU349666 | DQ019066                | EU349857                           | DQ023460                | KY754028<br>SAMA 48063             |
| <i>Maxomys dollmani</i>          | —                       | —        | —                       | —                                  | —                       | KY754029<br>MSB 93274              |
| <i>Maxomys musschenbroekii</i>   | —                       | —        | MF074893<br>MSB 93121   | MF097756<br>MSB 93121              | MF097877<br>MSB 93121   | KY754030<br>MSB 93121              |
| <i>Maxomys rajah</i>             | —                       | —        | —                       | KC878227                           | MF097878<br>MVZ 192210  | KC878137                           |
| <i>Maxomys surifer</i>           | —                       | KC953190 | DQ019065                | KC953396                           | —                       | HM217445                           |
| <i>Maxomys whiteheadi</i>        | MF110408<br>LSUMZ M5122 | —        | MF074894<br>LSUMZ M5122 | DQ191510                           | MF097879<br>LSUMZ M5122 | EU292150                           |
| <i>Megadontomys cryophilus</i>   | —                       | —        | —                       | —                                  | —                       | DQ861373                           |
| <i>Megadontomys thomasi</i>      | —                       | —        | EF989750                | EF989850                           | —                       | AY195795                           |
| <i>Melanomys caliginosus</i>     | —                       | —        | —                       | —                                  | —                       | EU340020                           |
| <i>Melanomys cf. idoneus</i>     | MF110409<br>LSUMZ 25552 | —        | MF074895<br>LSUMZ 25552 | MF097757<br>LSUMZ 25552            | MF097880<br>LSUMZ 25552 | EU340023                           |
| <i>Melanomys chrysomelas</i>     | MF110410<br>USNM 464387 | KC953191 | MF074896<br>USNM 464387 | EU649053                           | MF097881<br>USNM 464387 | KY754031<br>USNM 464387            |
| <i>Melanomys columbianus</i>     | —                       | —        | —                       | —                                  | —                       | EU340022                           |
| <i>Melasmothrix naso</i>         | EU349624                | —        | EU349815                | KC953398                           | —                       | KY754032<br>SAMA 65765             |
| <i>Melomys burtoni</i>           | JN114321                | —        | —                       | —                                  | —                       | —                                  |
| <i>Melomys capensis</i>          | JN114335                | —        | —                       | —                                  | —                       | —                                  |
| <i>Melomys cervinipes</i>        | EU349625                | —        | —                       | KC953399                           | EU349901                | —                                  |
| <i>Melomys leucogaster</i>       | JN114339                | —        | —                       | —                                  | —                       | —                                  |
| <i>Melomys lutillus</i>          | JN114319                | —        | —                       | —                                  | —                       | —                                  |
| <i>Melomys rubicola</i>          | JN114337                | —        | —                       | —                                  | —                       | —                                  |

|                                      |                           |          |          |                        |                        |                        |
|--------------------------------------|---------------------------|----------|----------|------------------------|------------------------|------------------------|
| <i>Melomys rufescens</i>             | EU349626                  | EU349690 | EU349816 | MF097758<br>EU349860   | EU349902               | KY754033<br>SAMA 43071 |
| <i>Meriones chengi</i>               | —                         | —        | —        | —                      | —                      | AB381900               |
| <i>Meriones crassus</i>              | KR088990                  | —        | —        | —                      | —                      | KR089028               |
| <i>Meriones libycus</i>              | —                         | —        | —        | —                      | —                      | KR089029               |
| <i>Meriones meridianus</i>           | —                         | —        | —        | —                      | —                      | AJ851268               |
| <i>Meriones persicus</i>             | KR088991                  | —        | —        | —                      | —                      | KR089030               |
| <i>Meriones rex</i>                  | —                         | —        | —        | —                      | —                      | AJ851265               |
| <i>Meriones shawi</i>                | —                         | AF332048 | AF332021 | KC953400               | AY294947               | —                      |
| <i>Meriones tamariscinus</i>         | —                         | —        | —        | —                      | —                      | AB381904               |
| <i>Meriones tristrami</i>            | KR088992                  | —        | —        | —                      | —                      | KR089032               |
| <i>Meriones unguiculatus</i>         | KR088993                  | —        | FN984754 | AY326095               | —                      | KR089031               |
| <i>Mesembriomys gouldii</i>          | DQ070382                  | EU349693 | EU349817 | MF097759<br>SAMA 07412 | EU349903               | KY754034<br>SAMA 07412 |
| <i>Mesocricetus auratus</i>          | MF110411<br>RA Cricetinae | AY295013 | AF540632 | AY163591               | AY294955               | KY754035               |
| <i>Mesocricetus brandti</i>          | —                         | —        | —        | —                      | —                      | AM904628               |
| <i>Mesocricetus newtoni</i>          | —                         | —        | —        | —                      | —                      | AJ973381               |
| <i>Mesocricetus raddei</i>           | —                         | —        | —        | —                      | —                      | AJ973382               |
| <i>Micaelamys namaquensis</i>        | MF110412<br>RA 12         | EU349649 | AY294914 | AM408330               | AY294941               | KY754036<br>RA 12      |
| <i>Microakodontomys transitorius</i> | —                         | —        | —        | EU649054               | —                      | —                      |
| <i>Micromys minutus</i>              | EU349627                  | EU349664 | EU349818 | EU349862               | EU349904               | AB201995               |
| <i>Microryzomys minutus</i>          | MF110413<br>MVZ 173975    | —        | KC953276 | AY163592               | KC953522               | AF108698               |
| <i>Microtus agrestis</i>             | MF110414<br>MVZ 159217    | —        | AM910792 | AM919427               | MF097882<br>MVZ 159217 | AY167174               |
| <i>Microtus arvalis</i>              | —                         | —        | AM392386 | AM919416               | —                      | AM991024               |
| <i>Microtus californicus</i>         | MF110415<br>MVZ 207423    | —        | KC953277 | KC953401               | KC953523               | KY754037<br>MVZ 207423 |
| <i>Microtus chrotorrhinus</i>        | —                         | —        | AM392383 | AM919403               | —                      | AF163893               |
| <i>Microtus daghestanicus</i>        | —                         | —        | GQ142009 | —                      | —                      | —                      |
| <i>Microtus duodecimcostatus</i>     | —                         | —        | AM392400 | —                      | —                      | —                      |
| <i>Microtus fortis</i>               | —                         | —        | GQ374494 | JF906129               | —                      | FJ986308               |
| <i>Microtus gregalis</i>             | —                         | —        | GQ142007 | —                      | —                      | —                      |
| <i>Microtus guentheri</i>            | —                         | —        | AM392397 | AM919420               | —                      | AY513805               |



|                                |                          |          |                         |                         |                         |                         |
|--------------------------------|--------------------------|----------|-------------------------|-------------------------|-------------------------|-------------------------|
| <i>Microtus kikuchii</i>       | MF110416<br>MVZ 201001   | —        | AM392385                | AM919410                | —                       | KY754038<br>MVZ 201001  |
| <i>Microtus limnophilus</i>    | —                        | —        | —                       | AM919426                | —                       | AM910620                |
| <i>Microtus longicaudus</i>    | MF110417<br>MVZ 196704   | —        | AM392379                | AM919414                | MF097883<br>MVZ 196704  | KY754039<br>MVZ 196704  |
| <i>Microtus majori</i>         | —                        | —        | AM910796                | AM919409                | —                       | —                       |
| <i>Microtus maximowiczii</i>   | —                        | —        | —                       | —                       | —                       | FJ986312                |
| <i>Microtus middendorffi</i>   | —                        | —        | AM392390                | AM919419                | —                       | FJ986314                |
| <i>Microtus mongolicus</i>     | —                        | —        | —                       | —                       | —                       | FJ986310                |
| <i>Microtus montanus</i>       | MF110418<br>FMNH 145964  | —        | KC953278                | KC953402                | KC953524                | KY754040<br>FMNH 145962 |
| <i>Microtus montebelli</i>     | —                        | —        | AM910793                | AM919421                | —                       | —                       |
| <i>Microtus ochrogaster</i>    | MF110419<br>TK 123149    | —        | MF074897<br>TK 123149   | MF097760<br>TK 123149   | MF097884<br>TK 123149   | KY754041<br>TK 123149   |
| <i>Microtus oeconomus</i>      | MF110420<br>LSUMZ 311219 | —        | AM392388                | AM919418                | —                       | AY305142                |
| <i>Microtus pennsylvanicus</i> | —                        | AY295009 | AF540633                | AM919415                | AY241463                | AF119279                |
| <i>Microtus pinetorum</i>      | MF110421<br>OMNHN 37823  | —        | MF074898<br>OMNHN 37823 | MF097761<br>OMNHN 37823 | MF097885<br>OMNHN 37823 | KY754042<br>OMNHN 37823 |
| <i>Microtus richardsoni</i>    | —                        | —        | AM392387                | AM919404                | —                       | AF163905                |
| <i>Microtus sachalinensis</i>  | —                        | —        | —                       | —                       | —                       | FJ986318                |
| <i>Microtus schelkownikovi</i> | —                        | —        | AM910794                | AM919408                | —                       | KY754043<br>MVZ 179136  |
| <i>Microtus socialis</i>       | MF110422<br>MVZ 198799   | —        | FM162073                | FM162055                | —                       | AY513830                |
| <i>Microtus thomasi</i>        | —                        | —        | AM910797                | AM919422                | —                       | AY513844                |
| <i>Microtus transcaspicus</i>  | —                        | —        | AM910795                | AM919405                | —                       | —                       |
| <i>Microtus xanthognathus</i>  | —                        | —        | —                       | —                       | —                       | KY754044<br>MVZ 149059  |
| <i>Millardia kathleenae</i>    | EU349628                 | —        | MF074899                | KC953403                | EU349905                | KY754045                |
| <i>Millardia meltada</i>       | —                        | —        | AM910962                | AM408322                | —                       | AF141221                |
| <i>Monticolomys koopmani</i>   | —                        | —        | GQ272598                | AY326096                | —                       | AF160580                |
| <i>Monticolomys sp.</i>        | MF110423<br>AMNH 275217  | —        | —                       | —                       | MF097886<br>AMNH 275217 | KY754046<br>AMNH 275217 |
| <i>Mus baoulei</i>             | —                        | —        | —                       | —                       | —                       | EU603998                |
| <i>Mus booduga</i>             | —                        | —        | —                       | AB125796                | AB125818                | AB125760                |
| <i>Mus bufo</i>                | —                        | —        | —                       | —                       | —                       | DQ789905                |
| <i>Mus caroli</i>              | MF110424<br>AMNH 275650  | —        | —                       | MF097762<br>AMNH 275650 | MF097887<br>AMNH 275650 | KY754047<br>AMNH 275650 |
| <i>Mus cervicolor</i>          | —                        | —        | —                       | AB125799                | AB125823                | AY057811                |

|                            |                         |          |                         |                        |                         |                         |
|----------------------------|-------------------------|----------|-------------------------|------------------------|-------------------------|-------------------------|
| <i>Mus cookii</i>          | MF110425<br>USNM 583802 | —        | KC953279                | KC953404               | MF097888<br>USNM 583802 | AY057813                |
| <i>Mus crociduroides</i>   | —                       | —        | —                       | AJ698894               | —                       | AJ698878                |
| <i>Mus famulus</i>         | MF110426<br>RA          | —        | —                       | AJ698884               | —                       | AJ698872                |
| <i>Mus fragilicauda</i>    | —                       | —        | —                       | AB125812               | —                       | AB125779                |
| <i>Mus gratus</i>          | —                       | —        | —                       | —                      | —                       | AY263613                |
| <i>Mus haussa</i>          | —                       | —        | —                       | AJ698891               | —                       | AJ875071                |
| <i>Mus indutus</i>         | —                       | —        | —                       | AJ698892               | —                       | AJ698874                |
| <i>Mus lepidoides</i>      | —                       | —        | —                       | AB262417               | —                       | AB262414                |
| <i>Mus macedonicus</i>     | —                       | —        | —                       | AB125805               | —                       | AB125770                |
| <i>Mus mattheyi</i>        | —                       | —        | —                       | AJ698889               | —                       | AJ698876                |
| <i>Mus minutoides</i>      | —                       | —        | —                       | AJ875086               | —                       | AJ875076                |
| <i>Mus musculooides</i>    | —                       | —        | —                       | —                      | —                       | AJ698875                |
| <i>Mus musculus</i>        | M99054                  | EU349657 | M33324                  | NM015745               | AY241462                | AF520621                |
| <i>Mus nitidulus</i>       | —                       | —        | —                       | AB262425               | —                       | AB269818                |
| <i>Mus pahari</i>          | EU349629                | —        | KC953280                | EU349864               | EU349906                | EU349767                |
| <i>Mus platythrix</i>      | —                       | —        | —                       | AJ698895               | —                       | —                       |
| <i>Mus saxicola</i>        | —                       | —        | —                       | —                      | —                       | AY057815                |
| <i>Mus setulosus</i>       | —                       | —        | —                       | AJ875088               | —                       | GU830865                |
| <i>Mus sorella</i>         | —                       | —        | —                       | —                      | —                       | DQ789904                |
| <i>Mus spicilegus</i>      | MF110427<br>MVZ 192264  | —        | MF074900<br>MVZ 192264  | AJ698882               | MF097889<br>MVZ 192264  | KY754048<br>MVZ 192264  |
| <i>Mus spretus</i>         | MF110428<br>MVZ 155909  | —        | —                       | AJ698883               | MF097890<br>MVZ 155909  | AY224678                |
| <i>Mus tenellus</i>        | —                       | —        | —                       | —                      | —                       | DQ789903                |
| <i>Mus terricolor</i>      | —                       | —        | —                       | AB125810               | AB125837                | AY193770                |
| <i>Mylomys dybowskii</i>   | —                       | —        | AM910965                | EU292146               | —                       | AF141212                |
| <i>Myodes andersoni</i>    | —                       | —        | AM392391                | —                      | —                       | AB037281                |
| <i>Myodes californicus</i> | MF110429<br>MVZ 208823  | —        | MF074901<br>MVZ 208823  | MF097763<br>MVZ 208823 | MF097891<br>MVZ 208823  | KY754049<br>MVZ 208823  |
| <i>Myodes centralis</i>    | —                       | —        | —                       | —                      | —                       | DQ845185                |
| <i>Myodes gapperi</i>      | —                       | AY295010 | MF074902<br>FMNH 145956 | AY326080               | AY294952                | KY754050<br>FMNH 145956 |
| <i>Myodes glareolus</i>    | MF110430<br>MVZ 179108  | JF930108 | JF930127                | AM919401               | —                       | AF119272                |
| <i>Myodes regulus</i>      | —                       | —        | —                       | —                      | —                       | DQ138116                |
| <i>Myodes rex</i>          | —                       | —        | —                       | —                      | —                       | AB031582                |
| <i>Myodes rufocanus</i>    | —                       | AY133336 | GQ142002                | —                      | —                       | FJ792791                |
| <i>Myodes rutilus</i>      | —                       | JF930113 | JF930129                | MF097764               | —                       | SAF09021                |

|                                 |             |          |            |            |            |            |
|---------------------------------|-------------|----------|------------|------------|------------|------------|
|                                 |             |          |            | TK 123027  |            |            |
| <i>Myodes smithii</i>           | —           | —        | —          | —          | —          | AB104508   |
| <i>Myomyscus brockmani</i>      | —           | —        | AM910966   | DQ022407   | —          | —          |
| <i>Myomyscus verreauxii</i>     | —           | —        | MF074903   | MF097765   | MF097892   | KY754051   |
|                                 |             |          | CM 95080   | CM 95080   | CM 95080   | CM 95080   |
| <i>Myomyscus yemeni</i>         | —           | —        | AM910968   | DQ022409   | —          | AF518357   |
| <i>Myopus schisticolor</i>      | —           | —        | GQ142001   | —          | —          | AF119263   |
| <i>Myospalax aspalax</i>        | MF110431    | KC953192 | KC953281   | AY326097   | KC953525   | KY754052   |
|                                 | MSB 100533  |          |            |            |            | MSB 100533 |
| <i>Myospalax psilurus</i>       | —           | —        | —          | —          | —          | AF326271   |
| <i>Myotomys sloggetti</i>       | —           | —        | —          | —          | —          | AF492724   |
| <i>Myotomys unisulcatus</i>     | —           | —        | —          | —          | —          | AF492729   |
| <i>Mystromys albicaudatus</i>   | —           | —        | GQ272600   | AY163594   | —          | AF160606   |
| <i>Napaeozapus insignis</i>     | MF110432    | AF540634 | KC953282   | AY326098   | KC953526   | KY754053   |
|                                 | H 678       |          |            |            |            | H 678      |
| <i>Neacomys dubosti</i>         | —           | —        | —          | —          | —          | FM210781   |
| <i>Neacomys guianae</i>         | —           | —        | —          | —          | —          | FM210778   |
| <i>Neacomys minutus</i>         | MF110433    | —        | KC953283   | MF097766   | KC953527   | KY754054   |
|                                 | MVZ 193750  |          |            | MVZ 193750 |            | MVZ 193750 |
| <i>Neacomys musseri</i>         | MF110434    | —        | MF074904   | MF097767   | MF097893   | KY754055   |
|                                 | MVZ 193763  |          | MVZ 193763 | MVZ 193763 | MVZ 193763 | MVZ 193763 |
| <i>Neacomys paracou</i>         | —           | —        | —          | —          | —          | FM210765   |
| <i>Neacomys spinosus</i>        | MF110435    | —        | KC953284   | KC953406   | KC953528   | U58391     |
|                                 | MVZ 155015  |          |            |            |            |            |
| <i>Necromys amoenus</i>         | MF110436    | KC953193 | KC953285   | MF097768   | KC953529   | AY273911   |
|                                 | MVZ 172877  |          |            | MVZ 172877 |            |            |
| <i>Necromys lactens</i>         | —           | —        | —          | —          | —          | EF531646   |
| <i>Necromys lasiurus</i>        | —           | —        | —          | —          | MF097894   | U03528     |
|                                 |             |          |            |            | MVZ 197603 |            |
| <i>Necromys lenguarum</i>       | MF110437    | —        | —          | —          | —          | EF531676   |
|                                 | USNM 584521 |          |            |            |            |            |
| <i>Necromys obscurus</i>        | —           | —        | —          | —          | —          | DQ683183   |
| <i>Necromys temchuki</i>        | —           | —        | —          | AY277461   | —          | AY273914   |
| <i>Necromys urichi</i> Amazonas | —           | —        | —          | —          | —          | U03549     |
| <i>Necromys urichi</i> Bolivar  | —           | —        | —          | AY277463   | —          | AY273918   |
| <i>Nectomys apicalis</i>        | MF110438    | —        | KC953286   | KC953407   | KC953530   | EU340013   |
|                                 | MVZ 166700  |          |            |            |            |            |
| <i>Nectomys squamipes</i>       | MF110439    | KC953194 | KC953287   | MF097769   | KC953531   | EU340012   |
|                                 | MVZ 192933  |          |            | MVZ 192933 |            |            |
| <i>Neodon irene</i>             | —           | —        | AY294924   | AM919412   | AY241464   | GU908312   |

|                               |                         |          |                        |                        |                         |                        |
|-------------------------------|-------------------------|----------|------------------------|------------------------|-------------------------|------------------------|
| <i>Neodon juldaschi</i>       | —                       | —        | —                      | —                      | —                       | EF599113               |
| <i>Neodon sikimensis</i>      | —                       | —        | GQ374496               | AY163593               | —                       | —                      |
| <i>Neofiber alleni</i>        | MF110440<br>USNM 568085 | —        | —                      | AM919425               | MF097895<br>USNM 568085 | AM910618               |
| <i>Neotoma albigula</i>       | MF110441<br>MVZ 197066  | —        | MF074905<br>MVZ 197066 | MF097770<br>MVZ 197066 | —                       | AF186814               |
| <i>Neotoma bryanti</i>        | MF110442<br>MVZ 195972  | —        | KC953288               | KC953408               | KC953532                | KY754056<br>MVZ 195972 |
| <i>Neotoma cinera</i>         | —                       | —        | —                      | KC953409               | KC953533                | KY754057<br>MVZ 207659 |
| <i>Neotoma devia</i>          | MF110443<br>MVZ 197117  | —        | —                      | KC953410               | KC953534                | KY754058<br>MVZ 197117 |
| <i>Neotoma floridana</i>      | MF110444<br>OK 107      | KC953195 | AY294959               | KC953411               | AY294959                | KY754059<br>OK 107     |
| <i>Neotoma fuscipes</i>       | —                       | —        | —                      | —                      | —                       | DQ179823               |
| <i>Neotoma goldmani</i>       | —                       | —        | —                      | —                      | —                       | DQ179827               |
| <i>Neotoma isthmica</i>       | —                       | —        | —                      | —                      | —                       | DQ179828               |
| <i>Neotoma lepida</i>         | MF110445<br>TK 119266   | —        | MF074906<br>TK 119266  | MF097771<br>TK 119266  | MF097896<br>TK 119266   | KY754060<br>TK 119266  |
| <i>Neotoma leucodon</i>       | —                       | —        | —                      | —                      | —                       | DQ179839               |
| <i>Neotoma macrotis</i>       | MF110446<br>MVZ 196550  | —        | —                      | —                      | —                       | KY754061<br>MVZ 196550 |
| <i>Neotoma magister</i>       | —                       | —        | —                      | —                      | —                       | DQ179856               |
| <i>Neotoma mexicana</i>       | MF110447<br>TK 122944   | —        | MF074907<br>TK 122944  | MF097772<br>TK 122944  | MF097897<br>TK 122944   | KY754062<br>TK 122944  |
| <i>Neotoma micropus</i>       | MF110448<br>TK 116316   | —        | MF074908<br>TK 116316  | MF097773<br>TK 116316  | MF097898<br>TK 116316   | KY754063<br>TK 116316  |
| <i>Neotoma picta</i>          | —                       | —        | —                      | —                      | —                       | DQ179851               |
| <i>Neotoma stephensi</i>      | MF110449<br>MVZ 197173  | —        | —                      | —                      | MF097899<br>MVZ 197173  | KY754064<br>MVZ 197173 |
| <i>Neotomodon alstoni</i>     | MF110450<br>MSB 418171  | KC953196 | KC953289               | KC953412               | KC953535                | KY754065<br>MSB 418171 |
| <i>Neotomys ebriosus</i>      | MF110451<br>JSB 506     | —        | KC953290               | KC953413               | KC953536                | KY754066<br>JSB 506    |
| <i>Nephelomys albigularis</i> | MF110452<br>LSUMZ 26987 | —        | —                      | AY163614               | MF097900<br>LSUMZ 26987 | EU579505               |
| <i>Nephelomys keaysi</i>      | —                       | —        | KC953291               | KC953414               | KC953537                | KY754067<br>MVZ 173987 |
| <i>Nephelomys levipes</i>     | MF110453<br>MVZ 166680  | —        | —                      | KC953415               | KC953538                | KY754068<br>MVZ 166680 |

|                                 |                         |          |          |                         |                         |                         |
|---------------------------------|-------------------------|----------|----------|-------------------------|-------------------------|-------------------------|
| <i>Nesokia indica</i>           | —                       | —        | —        | —                       | —                       | AF160605                |
| <i>Nesomys audiberti</i>        | —                       | —        | —        | —                       | MF097901<br>TRA 231     | KY754069<br>TRA 231     |
| <i>Nesomys rufus</i>            | MF110454<br>USNM 448955 | KC953197 | KC953292 | AY326099                | KC953539                | KY754070<br>USNM 448955 |
| <i>Nesoryzomys fernandinae</i>  | —                       | —        | —        | EU649058                | —                       | AF108700                |
| <i>Nesoryzomys indefessus</i>   | MF110455<br>MVZ 145384  | —        | —        | AY163600                | —                       | —                       |
| <i>Nesoryzomys swarthy</i>      | —                       | —        | —        | AY163601                | —                       | EU340014                |
| <i>Niviventer andersoni</i>     | MF110456<br>USNM 574357 | —        | —        | —                       | —                       | EF053003                |
| <i>Niviventer brahma</i>        | —                       | —        | —        | —                       | —                       | EF053010                |
| <i>Niviventer confucianus</i>   | MF110457<br>USNM 574365 | —        | KC953293 | KC953416                | KC953540                | JF714942                |
| <i>Niviventer coninga</i>       | —                       | —        | —        | —                       | —                       | EF053024                |
| <i>Niviventer cremoriventer</i> | MF110458<br>F 35796     | KC953198 | DQ019067 | KC953417                | KC953541                | KY754071<br>F 35796     |
| <i>Niviventer culteratus</i>    | MF110459<br>MVZ 180686  | KC953199 | DQ019068 | KC953418                | DQ023458                | GU479941                |
| <i>Niviventer eha</i>           | —                       | —        | —        | —                       | —                       | EF053018                |
| <i>Niviventer excelsior</i>     | MF110460<br>USNM 574373 | —        | EQ405386 | KC953419                | MF097902<br>USNM 574373 | GU479941                |
| <i>Niviventer fulvescens</i>    | —                       | —        | JN009859 | HM217657                | —                       | —                       |
| <i>Niviventer langbianis</i>    | MF110461<br>AMNH 272447 | —        | —        | HM217671                | MF097903<br>AMNH 272447 | GU457008                |
| <i>Niviventer niviventer</i>    | —                       | —        | —        | AM408323                | —                       | —                       |
| <i>Niviventer rapit</i>         | —                       | —        | —        | —                       | —                       | DQ191483                |
| <i>Niviventer tenaster</i>      | —                       | —        | —        | MF097774<br>AMNH 274355 | MF097904<br>AMNH 274355 | KY754072<br>AMNH 274355 |
| <i>Notiomys edwardsii</i>       | MF110462<br>MVZ 163067  | KC953200 | KC953294 | KC953420                | KC953542                | U03537                  |
| <i>Notomys alexis</i>           | —                       | —        | —        | —                       | —                       | AY176318                |
| <i>Notomys fuscus</i>           | DQ070379                | —        | KC953295 | EU360811                | EU349907                | KY754073<br>SAMA 34070  |
| <i>Nyctomys sumichrasti</i>     | —                       | KC953201 | KC953296 | KC953421                | MF097905<br>MSB 45815   | KY754074<br>MSB 45815   |
| <i>Ochrotomys nuttalli</i>      | MF110463<br>CM 106431   | KC953202 | KC953297 | KC953422                | KC953543                | KY754075<br>MSB 53299   |
| <i>Oecomys auyantepui</i>       | —                       | —        | —        | —                       | —                       | AJ496304                |
| <i>Oecomys bicolor</i>          | —                       | —        | KC953298 | KC953423                | KC953544                | AF108699                |

|                                   |                         |          |                         |                         |                         |                         |
|-----------------------------------|-------------------------|----------|-------------------------|-------------------------|-------------------------|-------------------------|
| <i>Oecomys catherinae</i>         | MF110464<br>MVZ 200982  | —        | —                       | AY163605                | —                       | EU579507                |
| <i>Oecomys concolor</i>           | —                       | —        | —                       | AY163606                | —                       | —                       |
| <i>Oecomys mamorae</i>            | —                       | —        | MF074909<br>MVZ 197692  | MF097775<br>MVZ 197692  | —                       | EU579509                |
| <i>Oecomys paricola</i>           | MF110465<br>MVZ 198000  | —        | MF074910<br>MVZ 198000  | —                       | —                       | KY754076<br>MVZ 198000  |
| <i>Oecomys rex</i>                | —                       | —        | —                       | —                       | —                       | AJ496314                |
| <i>Oecomys roberti</i>            | —                       | —        | —                       | —                       | —                       | KY754077<br>MVZ 200930  |
| <i>Oecomys rutilus</i>            | —                       | —        | —                       | —                       | —                       | AJ496312                |
| <i>Oecomys superans</i>           | —                       | KC953203 | KC953300                | AY277464                | KC953546                | KY754078<br>MVZ 155008  |
| <i>Oecomys tapajinus</i>          | —                       | —        | —                       | —                       | —                       | EU579508                |
| <i>Oecomys trinitatis</i>         | —                       | —        | MF074911<br>MVZ 200953  | MF097776<br>MVZ 200953  | MF097906<br>MVZ 200953  | U58390                  |
| <i>Oenomys hypoxanthus</i>        | MF110466<br>CM 102549   | EU349654 | DQ019069                | KC953425                | DQ023464                | KY754079<br>CM 102548   |
| <i>Oligoryzomys andinus</i>       | —                       | —        | —                       | —                       | —                       | L37400                  |
| <i>Oligoryzomys chacoensis</i>    | —                       | —        | MF074912<br>OMNHN 34273 | MF097777<br>OMNHN 34273 | MF097907<br>OMNHN 34273 | L37387                  |
| <i>Oligoryzomys destructor</i>    | MF110467<br>OMNHN 34310 | —        | —                       | EU649061                | —                       | KY754080<br>OMNHN 34310 |
| <i>Oligoryzomys eliurus</i>       | MF110468<br>MVZ 183083  | —        | —                       | MF097778<br>MVZ 183083  | MF097908<br>MVZ 183083  | EU192163                |
| <i>Oligoryzomys flavescens</i>    | —                       | —        | —                       | DQ826030                | —                       | DQ826015                |
| <i>Oligoryzomys fornesi</i>       | —                       | —        | —                       | DQ826033                | —                       | EU192158                |
| <i>Oligoryzomys fulvescens</i>    | MF110469<br>MVZ 155316  | KC953204 | —                       | AY163611                | KC953547                | —                       |
| <i>Oligoryzomys longicaudatus</i> | MF110470<br>MVZ 155842  | —        | KC953302                | KC953426                | KC953548                | GQ282541                |
| <i>Oligoryzomys magellanicus</i>  | —                       | —        | —                       | —                       | —                       | AY275705                |
| <i>Oligoryzomys messorius</i>     | —                       | —        | —                       | DQ826032                | —                       | DQ826024                |
| <i>Oligoryzomys microtis</i>      | MF110471<br>MVZ 190440  | —        | —                       | MF097779<br>MVZ 190440  | KC953549                | FJ374766                |
| <i>Oligoryzomys moojeni</i>       | —                       | —        | —                       | DQ826031                | —                       | DQ826019                |
| <i>Oligoryzomys nigripes</i>      | —                       | —        | —                       | DQ826029                | —                       | EU192161                |
| <i>Oligoryzomys stramineus</i>    | —                       | —        | —                       | AY163613                | —                       | DQ826026                |
| <i>Oligoryzomys vegetus</i>       | —                       | —        | —                       | EU649067                | —                       | L37386                  |
| <i>Ondatra zibethicus</i>         | KR088994                | AY295011 | AY294925                | KC953427                | AY294953                | KY754081                |

|                                |                         |            |                         |                        |                         |                         |
|--------------------------------|-------------------------|------------|-------------------------|------------------------|-------------------------|-------------------------|
| <i>Onychomys arenicola</i>     | —                       | —          | EF989755                | EF989856               | —                       | AY195793                |
| <i>Onychomys leucogaster</i>   | —                       | —          | KC953303                | EF989860               | KC953550                | AY195794                |
| <i>Onychomys torridus</i>      | MF110472<br>MVZ 206851  | —          | —                       | EF989861               | —                       | KY754082<br>ASNHC 4066  |
| <i>Oreoryzomys balneator</i>   | —                       | —          | —                       | EU649068               | —                       | EU258534                |
| <i>Oryzomys azuerensis</i>     | —                       | —          | —                       | —                      | —                       | EU074669                |
| <i>Oryzomys couesi</i>         | MF110473<br>CM 41027    | AF332043   | MF074913<br>CM 41027    | AY163618               | —                       | KY754083<br>CM 41027    |
| <i>Oryzomys mexicanus</i>      | —                       | —          | —                       | —                      | —                       | EU074646                |
| <i>Oryzomys palustris</i>      | MF110474<br>MSB 74956   | KC953205   | KC953304                | AY163623               | KC953551                | KY754084<br>MSB 74956   |
| <i>Osgoodomys banderanus</i>   | —                       | —          | EF989757                | EF989858               | —                       | KY754085<br>TK 11796    |
| <i>Otomys anchietae</i>        | —                       | —          | GQ405388                | AY326101               | —                       | —                       |
| <i>Otomys angoniensis</i>      | —                       | SAMA 65830 | MF074914<br>SAMA 65830  | AM408325               | MF097909<br>SAMA 65830  | KY754086<br>SAMA 65830  |
| <i>Otomys denti</i>            | —                       | —          | KC953305                | KC953428               | —                       | EU874434                |
| <i>Otomys irroratus</i>        | —                       | —          | —                       | —                      | —                       | KY754087<br>CAS 28393   |
| <i>Otomys jacksoni</i>         | —                       | —          | —                       | —                      | —                       | AF492727                |
| <i>Otomys lacustris</i>        | —                       | —          | —                       | —                      | —                       | EU874445                |
| <i>Otomys laminatus</i>        | —                       | —          | —                       | —                      | —                       | FJ619560                |
| <i>Otomys maximus</i>          | —                       | —          | —                       | —                      | —                       | AF492723                |
| <i>Otomys occidentalis</i>     | —                       | —          | —                       | —                      | —                       | JF795981                |
| <i>Otomys saundersiae</i>      | —                       | —          | —                       | —                      | —                       | FJ619559                |
| <i>Otomys tropicalis</i>       | —                       | —          | —                       | —                      | —                       | KY754088<br>FMNH 161144 |
| <i>Otomys typus</i>            | —                       | —          | —                       | —                      | —                       | EU874432                |
| <i>Ototylomys phyllotis</i>    | MF110475<br>F 35529     | AY295018   | AY294932                | KC953429               | KC953553                | KY754089<br>F 35529     |
| <i>Oxymycterus amazonicus</i>  | MF110476<br>USNM 549815 | —          | MF074915<br>USNM 549815 | —                      | MF097910<br>USNM 549815 | AF454765                |
| <i>Oxymycterus dasytrichus</i> | MF110477<br>MVZ 183127  | —          | —                       | —                      | MF097911<br>MVZ 183127  | KY754090<br>MVZ 183127  |
| <i>Oxymycterus delator</i>     | MF110478<br>MVZ 197931  | —          | MF074916<br>MVZ 197931  | MF097780<br>MVZ 197931 | MF097912<br>MVZ 197931  | U03525                  |
| <i>Oxymycterus hiska</i>       | MF110479<br>MVZ 171518  | —          | KC953306                | KC953430               | KC953554                | U03542                  |
| <i>Oxymycterus hispidus</i>    | MF110480<br>MVZ 193008  | —          | —                       | —                      | —                       | KY754091<br>MVZ 193008  |

|                                            |                         |          |                         |                         |                         |                         |
|--------------------------------------------|-------------------------|----------|-------------------------|-------------------------|-------------------------|-------------------------|
| <i>Oxymycterus josei</i>                   | MF110481<br>MVZ 193035  | —        | —                       | —                       | MF097913<br>MVZ 193035  | AF175289                |
| <i>Oxymycterus nasutus</i>                 | MF110482<br>MVZ 182701  | KC953206 | KC953307                | KC953431                | KC953555                | KY754092<br>MVZ 182701  |
| <i>Oxymycterus paramensis</i><br>Argentina | MF110483<br>OMNHN 34968 | —        | MF074917<br>OMNHN 34968 | MF097781<br>OMNHN 34968 | MF097914<br>OMNHN 34968 | DQ518261                |
| <i>Oxymycterus paramensis</i> Peru         | —                       | —        | —                       | —                       | —                       | U03536                  |
| <i>Oxymycterus quaestor</i>                | —                       | —        | —                       | —                       | —                       | AF454772                |
| <i>Oxymycterus rufus</i>                   | MF110484<br>OMNHN 30079 | —        | MF074918<br>OMNHN 30079 | MF097782<br>OMNHN 30079 | MF097915<br>OMNHN 30079 | AY275126                |
| <i>Oxymycterus wayku</i>                   | —                       | —        | —                       | —                       | —                       | DQ518262                |
| <i>Pachyuromys duprasi</i>                 | —                       | —        | —                       | —                       | —                       | AJ851274                |
| <i>Parahydromys asper</i>                  | EU349631                | EU349698 | EU349820                | MF097783<br>SAMA 45798  | EU349910                | KY754093<br>SAMA 45798  |
| <i>Paramelomys levipes</i>                 | EU349632                | EU349689 | EU349821                | EU349867                | MF097916<br>KU 160736   | KY754094<br>KU 160736   |
| <i>Paramelomys platyops</i>                | MF110485<br>MVZ 141054  | —        | —                       | —                       | —                       | KY754095<br>MVZ 141054  |
| <i>Paramelomys rubex</i>                   | JN114347                | —        | —                       | —                       | —                       | —                       |
| <i>Parotomys brantsii</i>                  | MF110486<br>H 656       | EU349646 | AY294912                | KC953432                | MF097917<br>H 656       | KY754096<br>H 656       |
| <i>Paruromys dominator</i>                 | EU349634                | EU349669 | EU349822                | KC953433                | —                       | KY754097<br>SAMA 65763  |
| <i>Pearsonomys annectens</i>               | —                       | —        | —                       | AY851749                | —                       | AF108672                |
| <i>Pelomys fallax</i>                      | —                       | —        | —                       | DQ022391                | —                       | DQ022382                |
| <i>Peromyscus attwateri</i>                | MF110487<br>OMNHN 33377 | —        | MF074919<br>OMNHN 33377 | MF097784<br>OMNHN 33377 | MF097918<br>OMNHN 33377 | KY754098<br>OMNHN 33377 |
| <i>Peromyscus aztecus</i>                  | MF110488<br>LSUMZ 25106 | —        | KC953308                | KC953434                | KC953556                | EF989968                |
| <i>Peromyscus boylii</i>                   | MF110489<br>MVZ 216481  | —        | KC953309                | KC953435                | KC953557                | AF155386                |
| <i>Peromyscus californicus</i>             | MF110490<br>MVZ 199654  | —        | EF989772                | EF989873                | —                       | KY754099<br>MVZ 199654  |
| <i>Peromyscus cf. hyllocetes</i>           | —                       | —        | —                       | —                       | —                       | KY754100<br>LSUMZ 25106 |
| <i>Peromyscus cf. spicilegus</i>           | —                       | —        | —                       | —                       | —                       | KY754101<br>CM 103724   |
| <i>Peromyscus crinitus</i>                 | MF110491<br>MVZ 217321  | —        | KC953310                | KC953436                | KC953558                | KY754102<br>MVZ 217321  |
| <i>Peromyscus difficilis</i>               | MF110492                | —        | MF074920                | —                       | MF097919                | KY754103                |



|                                                 |                                        |          |                         |           |                         |                                        |
|-------------------------------------------------|----------------------------------------|----------|-------------------------|-----------|-------------------------|----------------------------------------|
| <i>Peromyscus eremicus</i>                      | LSUMZ 36247<br>MF110493                | —        | LSUMZ 36247<br>MF074921 | EF989877  | LSUMZ 36247<br>MF097920 | LSUMZ 36247<br>KY754104                |
| <i>Peromyscus fraterculus</i>                   | LSUMZ 34364<br>MF110494<br>USNM 569216 | —        | LSUMZ 34364<br>KC953311 | KC953437  | LSUMZ 34364<br>KC953559 | LSUMZ 34364<br>KY754105<br>USNM 569216 |
| <i>Peromyscus furvus</i>                        | —                                      | —        | —                       | —         | —                       | AF271027                               |
| <i>Peromyscus gossypinus</i>                    | MF110495<br>LSUMZ 26782                | —        | —                       | —         | MF097921<br>LSUMZ 26782 | DQ973102                               |
| <i>Peromyscus keeni</i>                         | —                                      | —        | —                       | —         | —                       | X89787                                 |
| <i>Peromyscus leucopus</i>                      | MF110496<br>OK 14                      | AY295014 | AY294927                | EF989880  | MF097922<br>OK 015      | KY754106<br>OK 014                     |
| <i>Peromyscus levipes</i>                       | MF110497<br>MVZ 159526                 | —        | EF989782                | EF989882  | —                       | KY754107<br>MVZ 159526                 |
| <i>Peromyscus maniculatus</i><br>California     | —                                      | —        | —                       | —         | MF097923<br>MVZ 200760  | KY754108<br>MVZ 200760                 |
| <i>Peromyscus maniculatus</i><br>Northern range | —                                      | —        | EF989783                | AY163630  | —                       | DQ385808                               |
| <i>Peromyscus mayensis</i>                      | —                                      | —        | EF989787                | EF989888  | —                       | EF989987                               |
| <i>Peromyscus melanophrys</i>                   | —                                      | —        | —                       | EF989890  | —                       | —                                      |
| <i>Peromyscus melanotis</i>                     | —                                      | —        | EF989790                | —         | —                       | X89791                                 |
| <i>Peromyscus mexicanus</i> Costa Rica          | —                                      | —        | EF989793                | EF989894  | —                       | EF989993                               |
| <i>Peromyscus mexicanus</i> Veracruz            | —                                      | —        | —                       | —         | —                       | EF028174                               |
| <i>Peromyscus nudipes</i>                       | —                                      | —        | EF989792                | EF989893  | —                       | —                                      |
| <i>Peromyscus polionotus</i>                    | —                                      | —        | EF989795                | EF989896  | —                       | EF989995                               |
| <i>Peromyscus polius</i>                        | —                                      | —        | —                       | —         | —                       | AF155403                               |
| <i>Peromyscus truei</i>                         | MF110498<br>MVZ 197293                 | —        | —                       | AY277413  | —                       | KY754109<br>MVZ 197293                 |
| <i>Peromyscus winkelmanni</i>                   | —                                      | —        | —                       | —         | —                       | U89983                                 |
| <i>Petromyscus collinus</i>                     | —                                      | —        | —                       | DQ191517  | —                       | AF160600                               |
| <i>Petromyscus monticularis</i>                 | MF110499<br>RA 14                      | AY294999 | AY294906                | —         | MF097924<br>RA 14       | KY754110<br>RA 14                      |
| <i>Phaiomys leucurus</i>                        | —                                      | —        | AM392394                | AM919400  | —                       | AM392371                               |
| <i>Phenacomys intermedius</i>                   | MF110500<br>MVZ 201914                 | —        | AM392377                | KC953438  | MF097925<br>MVZ 201914  | KY754111<br>MVZ 201914                 |
| <i>Phloeomys cumingi</i>                        | —                                      | —        | —                       | AY326103  | —                       | DQ191484                               |
| <i>Phloeomys pallidus</i>                       | DQ023451                               | EU349644 | DQ019070                | KC8878237 | DQ023480                | —                                      |
| <i>Phodopus campbelli</i>                       | —                                      | —        | —                       | —         | —                       | AF119278                               |
| <i>Phodopus roborovskii</i>                     | —                                      | —        | —                       | —         | —                       | EF025539                               |
| <i>Phodopus sungorus</i>                        | —                                      | AY295012 | AF540640                | KC953439  | AY294954                | KY754112                               |
| <i>Phyllotis alisosiensis</i>                   | —                                      | —        | —                       | —         | —                       | GQ119626                               |

|                                          |                         |          |                        |                        |                       |                         |
|------------------------------------------|-------------------------|----------|------------------------|------------------------|-----------------------|-------------------------|
| <i>Phyllotis amicus</i>                  | MF110501<br>UNSM 10787  | —        | —                      | —                      | AY963207              | AY956708                |
| <i>Phyllotis andium</i>                  | MF110502<br>ORB 125     | —        | KC953312               | MF097785<br>UNSM 10750 | AY963204              | AY956706                |
| <i>Phyllotis anitae</i>                  | —                       | —        | —                      | —                      | —                     | AY627298                |
| <i>Phyllotis bonariensis</i>             | MF110503<br>SA 02       | —        | —                      | —                      | AY963250              | AY956731                |
| <i>Phyllotis caprinus</i>                | —                       | —        | MF074922<br>OMNH 30082 | MF097786<br>OMNH 30082 | —                     | KY754113<br>OMNH 30082  |
| <i>Phyllotis darwini</i>                 | MF110504<br>MSB 69977   | —        | AF332023               | —                      | AY963212              | AY956729                |
| <i>Phyllotis gerbillus</i>               | MF110505<br>ORB 58      | —        | —                      | —                      | AY963206              | AY956713                |
| <i>Phyllotis haggardi</i>                | —                       | —        | MF074923<br>TK 104756  | MF097787<br>TK 104756  | MF097926<br>TK 104756 | KY754114<br>TK 104756   |
| <i>Phyllotis limatus</i>                 | MF110506<br>ORB 34      | —        | —                      | —                      | —                     | AY956740                |
| <i>Phyllotis magister</i>                | MF110507<br>FMNH 107691 | —        | —                      | —                      | AY963234              | AY956721                |
| <i>Phyllotis osilae</i>                  | MF110508<br>MSB 67272   | KC953207 | KC953313               | KC953440               | KC953560              | AY956711                |
| <i>Phyllotis xanthopygus posticalis</i>  | —                       | —        | —                      | —                      | —                     | KY754115<br>ORB_92      |
| <i>Phyllotis xanthopygus xanthopygus</i> | KR088995                | KC953208 | KC953314               | AY163632               | KC953561              | U86833                  |
| <i>Podomys floridanus</i>                | —                       | —        | EF989778               | EF989879               | —                     | DQ973110                |
| <i>Pogonomys loriae</i>                  | EU349635                | EU349683 | EU349823               | KC953441               | EU349912              | EU349776                |
| <i>Pogonomys macrourus</i>               | EU349636                | EU349684 | EU349824               | MF097788<br>SAMA 43144 | EU349913              | KY754116<br>SAMA 43144  |
| <i>Pogonomys sylvestris</i>              | —                       | —        | GQ405389               | GQ405365               | —                     | —                       |
| <i>Praomys daltoni</i>                   | —                       | —        | AM910972               | DQ022406               | —                     | AF518348                |
| <i>Praomys degraaffi</i>                 | —                       | —        | KC953315               | KC953442               | KC953562              | KY754117<br>FMNH 138046 |
| <i>Praomys delectorum</i>                | —                       | —        | —                      | AY326104               | —                     | JQ735742                |
| <i>Praomys derooi</i>                    | —                       | —        | —                      | DQ022405               | —                     | AF518350                |
| <i>Praomys hartwigi</i>                  | —                       | —        | JF284245               | —                      | —                     | AF518367                |
| <i>Praomys jacksoni</i>                  | MF110509<br>CM 102583   | EU349663 | DQ019071               | KC953443               | DQ023477              | KY754118<br>CM 102584   |
| <i>Praomys misonnei</i>                  | MF110510<br>FMNH 149576 | —        | KC953316               | KC953444               | KC953563              | KY754119<br>FMNH 149576 |
| <i>Praomys morio</i>                     | —                       | —        | JF284240               | —                      | —                     | —                       |

|                                     |                       |          |                      |                        |                         |                         |
|-------------------------------------|-----------------------|----------|----------------------|------------------------|-------------------------|-------------------------|
| <i>Praomys obscurus</i>             | —                     | —        | JF284248             | —                      | —                       | —                       |
| <i>Praomys petteri</i>              | —                     | —        | JF284249             | —                      | —                       | AF518368                |
| <i>Praomys rostratus</i>            | —                     | —        | JF284239             | —                      | —                       | GU397446                |
| <i>Praomys tullbergi</i>            | DQ023448              | EU349662 | DQ019072             | DQ022413               | DQ023478                | KY754120<br>CM 108199   |
| <i>Praomys verschureni</i>          | —                     | —        | —                    | DQ022394               | —                       | AF518373                |
| <i>Proedromys bedfordi</i>          | —                     | —        | GQ374485             | JF906130               | —                       | —                       |
| <i>Proedromys liangshanensis</i>    | —                     | —        | GQ374492             | JF906133               | —                       | —                       |
| <i>Prometheomys schaposchnikowi</i> | —                     | —        | AM392395             | AM919406               | —                       | AM392372                |
| <i>Psammomys obesus</i>             | KR088996              | —        | MF074924<br>TK 40892 | FN357290               | MF097927<br>TK 40892    | KR089035                |
| <i>Psammomys vexillaris</i>         | —                     | —        | —                    | —                      | —                       | AY934541                |
| <i>Pseudohydromys ellermani</i>     | EU349623              | EU349695 | EU349814             | MF097789<br>SAMA 43920 | MF097928<br>SAMA 43920  | KY754121<br>SAMA 43920  |
| <i>Pseudomys australis</i>          | —                     | EU349688 | DQ019073             | EU349870               | DQ023469                | AM910936                |
| <i>Pseudomys chapmani</i>           | —                     | —        | —                    | —                      | —                       | AY176320                |
| <i>Pseudomys desertor</i>           | —                     | —        | —                    | —                      | —                       | AY176326                |
| <i>Pseudomys hermannsburgensis</i>  | —                     | —        | —                    | —                      | —                       | AY176321                |
| <i>Pseudomys shortridgei</i>        | —                     | —        | —                    | —                      | —                       | FJ946452                |
| <i>Pseudoryzomys simplex</i>        | MF110511<br>MSB 80490 | —        | KC953317             | AY163633               | KC953564                | KY754122<br>MSB 80490   |
| <i>Punomys kofordi</i>              | MF110512<br>VPT 1890  | KC953209 | KC953318             | KC953445               | KC953565                | KY754123<br>VPT 1890    |
| <i>Rattus andamanensis</i>          | —                     | —        | —                    | HM217641               | MF097929<br>AMNH 272324 | KY754124<br>AMNH 272324 |
| <i>Rattus argentiventer</i>         | —                     | —        | —                    | HM217602               | MF097930<br>MSB 93171   | KY754125<br>MSB 93171   |
| <i>Rattus colletti</i>              | —                     | —        | —                    | HQ334598               | —                       | —                       |
| <i>Rattus everetti</i>              | —                     | —        | —                    | DQ191513               | —                       | DQ191485                |
| <i>Rattus exulans</i>               | MF110513<br>NK 80010  | —        | DQ019074             | KC953446               | DQ023455                | KY754126<br>NK 80010    |
| <i>Rattus facetus</i>               | —                     | —        | —                    | —                      | —                       | KY754127<br>MSB 93164   |
| <i>Rattus fuscipes</i>              | —                     | —        | —                    | HQ334610               | —                       | EF186435                |
| <i>Rattus giluwensis</i>            | —                     | HQ334419 | —                    | HQ334606               | HQ334673                | —                       |
| <i>Rattus hoffmanni</i>             | —                     | —        | —                    | —                      | —                       | EF186441                |
| <i>Rattus leucopus</i>              | MF110514<br>KU 160771 | EU349672 | EU349825             | HQ334621               | EU349914                | KY754128<br>KU 160770   |
| <i>Rattus losea</i>                 | —                     | —        | —                    | —                      | —                       | HM031715                |
| <i>Rattus lutreolus</i>             | —                     | —        | —                    | —                      | —                       | GU570671                |

|                                      |                         |          |                         |                         |                         |                         |
|--------------------------------------|-------------------------|----------|-------------------------|-------------------------|-------------------------|-------------------------|
| <i>Rattus niobe</i>                  | —                       | —        | —                       | HQ334580                | —                       | —                       |
| <i>Rattus nitidus</i>                | —                       | —        | —                       | HM217711                | —                       | HM217479                |
| <i>Rattus norvegicus</i>             | DQ023418                | EU349671 | X16726                  | AB033709                | AY294938                | KY754129                |
| <i>Rattus novaeguineae</i>           | MF110515<br>SAMA 46853  | KC953210 | KC953319                | KC953447                | KC953566                | KY754130<br>SAMA 46853  |
| <i>Rattus praetor</i>                | MF110516<br>USNM 580077 | —        | GQ405392                | KC953448                | KC953567                | DQ191487                |
| <i>Rattus rattus</i>                 | —                       | —        | AM910976                | HM217606                | HQ334643                | —                       |
| <i>Rattus satarae</i>                | —                       | —        | —                       | HM217749                | —                       | HM217739                |
| <i>Rattus sordidus</i>               | —                       | HQ334411 | —                       | HQ334599                | HQ334691                | EF186480                |
| <i>Rattus steini</i>                 | —                       | —        | —                       | HQ334588                | —                       | —                       |
| <i>Rattus tanezumi</i>               | —                       | —        | —                       | HM217694                | —                       | FR775851                |
| <i>Rattus tiomanicus</i>             | KR088997                | —        | KC953320                | KC953449                | KC953568                | HM217391                |
| <i>Rattus tunneyi</i>                | —                       | —        | —                       | HQ334612                | —                       | EF186518                |
| <i>Rattus verecundus</i>             | MF110517<br>SAMA 43425  | KC953211 | KC953321                | MF097790<br>SAMA 43425  | KC953569                | KY754131<br>SAMA 43425  |
| <i>Rattus villosissimus</i>          | DQ070372                | EU349673 | EU349826                | HQ334576                | MF097931<br>SAMA 00549  | KY754132<br>SAMA 00549  |
| <i>Reithrodon auritus</i> Entre Rios | —                       | —        | —                       | —                       | —                       | AY275129                |
| <i>Reithrodon auritus</i> Rio Negro  | MF110518<br>MVZ 182707  | KC953212 | AY294930                | AY277472                | MF097932<br>MVZ 182707  | KY754133<br>MVZ 182707  |
| <i>Reithrodontomys brevirostris</i>  | —                       | —        | EF989817                | EF989918                | —                       | EF990017                |
| <i>Reithrodontomys creper</i>        | MF110519<br>ROM 113346  | —        | KC953322                | KC953450                | KC953570                | AY859429                |
| <i>Reithrodontomys dariensis</i>     | —                       | —        | EF989815                | EF989916                | —                       | EF990015                |
| <i>Reithrodontomys fulvescens</i>    | MF110520<br>OK 326      | AY295015 | AY294928                | EF989904                | AY294958                | KY754134<br>OK 326      |
| <i>Reithrodontomys gracilis</i>      | MF110521<br>JM Rg13     | —        | EF989807                | EF989905                | KC953571                | AY859432                |
| <i>Reithrodontomys humulis</i>       | MF110522<br>OMNHN 36692 | —        | MF074925<br>OMNHN 36692 | MF097791<br>OMNHN 36692 | MF097933<br>OMNHN 36692 | KY754135<br>OMNHN 36692 |
| <i>Reithrodontomys megalotis</i>     | HQ269526                | —        | KC953323                | AY277414                | KC953572                | KY754136<br>ASHNC 2136  |
| <i>Reithrodontomys mexicanus</i>     | HQ269527                | —        | EF989805                | EF989906                | —                       | KY754137<br>JM K        |
| <i>Reithrodontomys microdon</i>      | MF110523<br>ROM 98300   | —        | EF989814                | EF989915                | —                       | KY754138<br>ROM 98300   |
| <i>Reithrodontomys spectabilis</i>   | MF110524<br>JM L        | —        | EF989822                | EF989923                | —                       | AY859462                |
| <i>Reithrodontomys sumichrasti</i>   | MF110525                | —        | EF989824                | EF989924                | MF097934                | KY754139                |

|                                 |                         |          |                         |                         |                        |                         |
|---------------------------------|-------------------------|----------|-------------------------|-------------------------|------------------------|-------------------------|
|                                 | ROM 98384               |          |                         |                         | ROM 98384              | ROM 98384               |
| <i>Rhabdomys dilectus</i>       | —                       | —        | —                       | —                       | —                      | FR837633                |
| <i>Rhabdomys pumilio</i>        | MF110526<br>RA 23       | EU349650 | AY294913                | EU349871                | AY294940               | KY754140<br>RA 23       |
| <i>Rhagomys longilingua</i>     | MF110527<br>FMNH 175218 | —        | MF074926<br>FMNH 175218 | MF097792<br>FMNH 175218 | —                      | KY754141<br>FMNH 175218 |
| <i>Rhagomys rufescens</i>       | —                       | —        | —                       | —                       | —                      | AY206770                |
| <i>Rheomys raptor</i>           | MF110528<br>KU 159017   | —        | —                       | AY163635                | MF097935<br>KU 159017  | KY754142<br>KU 159017   |
| <i>Rheomys thomasi</i>          | —                       | —        | KC960491                | KC953451                | KR089049               | —                       |
| <i>Rhipidomys cariri</i>        | —                       | —        | —                       | —                       | —                      | HM594666                |
| <i>Rhipidomys emilae</i>        | —                       | —        | —                       | —                       | —                      | AF108682                |
| <i>Rhipidomys gardneri</i>      | —                       | —        | —                       | —                       | —                      | U03550                  |
| <i>Rhipidomys ipukensis</i>     | —                       | —        | —                       | —                       | —                      | HM594633                |
| <i>Rhipidomys itoan</i>         | —                       | —        | —                       | —                       | —                      | HM594658                |
| <i>Rhipidomys leucodactylus</i> | MF110529<br>MVZ 190590  | —        | MF074927<br>MVZ 190590  | MF097793<br>MVZ 190590  | MF097936<br>MVZ 190590 | HQ634183                |
| <i>Rhipidomys macconnelli</i>   | MF110530<br>MVZ 160083  | KC953213 | KC953324                | AY277474                | KC953573               | AF108681                |
| <i>Rhipidomys macrurus</i>      | MF110531<br>MVZ 197543  | —        | —                       | —                       | —                      | KY754143<br>MVZ 197543  |
| <i>Rhipidomys masticalis</i>    | MF110532<br>MVZ 193037  | KC953214 | AY294929                | KC953452                | AY294961               | AF108684                |
| <i>Rhipidomys nitela</i>        | MF110533<br>MVZ 197548  | —        | MF074928<br>MVZ 197548  | MF097794<br>MVZ 197548  | MF097937<br>MVZ 197548 | HM594665                |
| <i>Rhipidomys</i> sp. 1         | —                       | —        | —                       | —                       | —                      | AF108683                |
| <i>Rhipidomys tribei</i>        | —                       | —        | —                       | —                       | —                      | HM594663                |
| <i>Rhipidomys venezuelae</i>    | MF110534<br>AMNH 24857  | —        | —                       | —                       | MF097938<br>AMNH 24857 | KY754144<br>AMNH 24857  |
| <i>Rhipidomys venustus</i>      | MF110535<br>AMNH 24865  | —        | —                       | MF097795<br>AMNH 24865  | MF097939<br>AMNH 24865 | KY754145<br>AMNH 24865  |
| <i>Rhipidomys wetzeli</i>       | —                       | —        | —                       | —                       | —                      | AF108680                |
| <i>Rhizomys pruinosus</i>       | —                       | —        | AY294899                | MF097796<br>MVZ 176525  | KC953574               | KY754146<br>MVZ 176525  |
| <i>Rhombomys opimus</i>         | —                       | —        | —                       | —                       | —                      | AJ430556                |
| <i>Rhynchomys isarogensis</i>   | AY324462                | EU349677 | DQ019075                | KC953453                | AY294944               | EU349784                |
| <i>Saccostomus campestris</i>   | MF110536<br>SAMA 65838  | KC953215 | KC953325                | AY326109                | KC953575               | KY754147<br>SAMA 65838  |
| <i>Salinomys delicatus</i>      | MF110537                | —        | MF074929                | MF097797                | MF097940               | EU377608                |

|                                  |               |          |             |             |             |             |
|----------------------------------|---------------|----------|-------------|-------------|-------------|-------------|
|                                  | OMNHN 23602   |          | OMNHN 23602 | OMNHN 23602 | OMNHN 23602 |             |
| <i>Scapteromys aquaticus</i>     | —             | —        | —           | AY277476    | —           | AY275132    |
| <i>Scapteromys tumidus</i>       | MF110538      | —        | KC953326    | AY277477    | KC953576    | KY754148    |
|                                  | MVZ 183267    |          |             |             |             | MVZ 183267  |
| <i>Scolomys juruaense</i>        | MF110539      | —        | KC953327    | KC953454    | KC953577    | —           |
|                                  | MVZ 183165    |          |             |             |             |             |
| <i>Scolomys melanops</i>         | —             | —        | —           | —           | —           | AF527419    |
| <i>Scolomys ucayalensis</i>      | —             | —        | MF074930    | MF097798    | MF097941    | EU579518    |
|                                  |               |          | AMNH 272721 | AMNH 272721 | AMNH 272721 |             |
| <i>Scotinomys teguina</i>        | MF110540      | KC953216 | KC953328    | MF097799    | KC953578    | AF108705    |
|                                  | JM B          |          |             | JM B        |             |             |
| <i>Scotinomys xerampelinus</i>   | MF110541      | —        | —           | MF097800    | MF097942    | KY754149    |
|                                  | LSUMZ 25166   |          |             | JM N        | LSUMZ 25166 | ROM_97311   |
| <i>Sekeetamys calurus</i>        | KR088998      | —        | —           | —           | —           | AJ851276    |
| <i>Sicista concolor</i>          | —             | —        | —           | JF835107    | —           | —           |
| <i>Sicista tianshanica</i>       | MF110542      | —        | KC953329    | AF297288    | KC953579    | KY754150    |
|                                  | RA Sicistinae |          |             |             |             |             |
| <i>Sigmodon alleni</i> Michoacan | —             | —        | —           | —           | —           | AF155425    |
| <i>Sigmodon alleni</i> Oaxaca    | MF110543      | —        | MF074931    | MF097801    | MF097943    | KY754151    |
|                                  | TK 150546     |          | TK 150546   | TK 150546   | TK 150546   | TK 150546   |
| <i>Sigmodon alstoni</i>          | MF110544      | KC953217 | KC953330    | KC953455    | KC953580    | KY754152    |
|                                  | AMCC 112960   |          |             |             |             | AMCC 112960 |
| <i>Sigmodon arizonae</i>         | MF110545      | KC953218 | KC953331    | EU635700    | KC953581    | KY754153    |
|                                  | MSB 54086     |          |             |             |             | MSB 54086   |
| <i>Sigmodon fulviventer</i>      | MF110546      | —        | MF074932    | MF097802    | MF097944    | KY754154    |
|                                  | TK 72392      |          | TK 72392    | TK 72392    | TK 72392    | TK 72392    |
| <i>Sigmodon hirsutus</i>         | —             | —        | MF074933    | MF097803    | MF097945    | AY517528    |
|                                  |               |          | TK 119145   | TK 119145   | TK 119145   |             |
| <i>Sigmodon hispidus</i>         | KR088999      | AY295016 | AF540641    | AY277479    | AY241465    | AF425200    |
| <i>Sigmodon leucotis</i>         | —             | —        | —           | EU635712    | —           | AF293401    |
| <i>Sigmodon mascotensis</i>      | MF110547      | —        | MF074934    | MF097804    | MF097946    | AF155424    |
|                                  | TK 150550     |          | TK 150550   | TK 150550   | TK 150550   |             |
| <i>Sigmodon ochrognathus</i>     | MF110548      | —        | MF074935    | MF097805    | MF097947    | AF155422    |
|                                  | TK 48160      |          | TK 48160    | TK 48160    | TK 48160    |             |
| <i>Sigmodon peruanus</i>         | —             | —        | —           | EU635719    | —           | AF293395    |
| <i>Sigmodon toltecus</i>         | MF110549      | —        | MF074936    | MF097806    | MF097948    | AF425228    |
|                                  | TK 136997     |          | TK 136997   | TK 136997   | TK 136997   |             |
| <i>Sigmodontomys alfari</i>      | MF110550      | KC953219 | KC953332    | AY163641    | KC953582    | KY754155    |
|                                  | USNM 449895   |          |             |             |             | USNM 575662 |
| <i>Solomys ponceleti</i>         | JN114358      | —        | —           | —           | —           | —           |

|                                    |                         |          |                         |                        |          |                         |
|------------------------------------|-------------------------|----------|-------------------------|------------------------|----------|-------------------------|
| <i>Solomys salebrosus</i>          | EU349638                | EU349691 | EU349827                | EU349872               | EU349917 | EU349785                |
| <i>Sooretamys angouya</i>          | MF110551<br>MVZ 182806  | —        | KC953333                | AY163616               | KC953583 | KY754156<br>MVZ 192961  |
| <i>Soricomys kalinga</i>           | —                       | —        | —                       | —                      | —        | JQ898059                |
| <i>Soricomys leonardocoi</i>       | —                       | —        | —                       | JQ898077               | —        | JQ898062                |
| <i>Soricomys montanus</i>          | —                       | —        | —                       | JQ898076               | —        | JQ898066                |
| <i>Soricomys musseri</i>           | —                       | —        | —                       | JQ898075               | —        | JQ898071                |
| <i>Spalax carmeli</i>              | —                       | —        | —                       | —                      | —        | JN571137                |
| <i>Spalax ehrenbergi</i>           | —                       | JN414208 | AY294898                | KC953405               | AB303250 | KY754157<br>H 150       |
| <i>Spalax galili</i>               | —                       | —        | —                       | —                      | —        | JN571129                |
| <i>Spalax judaei</i>               | —                       | —        | —                       | —                      | —        | JN571135                |
| <i>Spalax leucodon</i>             | —                       | —        | —                       | —                      | —        | FJ656299                |
| <i>Spalax nehringi</i>             | —                       | —        | —                       | —                      | —        | GQ374526                |
| <i>Spalax zemni</i>                | —                       | —        | —                       | SZU48589               | —        | —                       |
| <i>Srilankamys ohiensis</i>        | —                       | —        | JN009860                | —                      | —        | —                       |
| <i>Steatomys krebsi</i>            | —                       | KC953220 | KC953334                | KC953457               | KC953584 | KY754158<br>CM 6328     |
| <i>Steatomys parvus</i>            | —                       | —        | GQ272602                | AY326110               | —        | AF160598                |
| <i>Stenocephalemys albipes</i>     | —                       | —        | AM910977                | DQ022404               | —        | AF518347                |
| <i>Stenocephalemys albocaudata</i> | —                       | —        | AM910978                | DQ022414               | —        | AF518370                |
| <i>Stenocephalemys griseicauda</i> | —                       | —        | —                       | —                      | —        | AF518371                |
| <i>Stochomys longicaudatus</i>     | DQ023429                | EU349652 | DQ019076                | KC953458               | KC953585 | KY754159<br>CM 108122   |
| <i>Sundamys muelleri</i>           | DQ023420                | EU349668 | DQ019077                | AY326111               | DQ023456 | KY754160<br>MVZ 192334  |
| <i>Synaptomys borealis</i>         | —                       | —        | MF074937<br>MSB 158056  | MF097807<br>MSB 158056 | —        | KY754161<br>MSB 158056  |
| <i>Synaptomys cooperi</i>          | MF110552<br>USNM 568611 | KC953221 | KC953335                | KC953459               | KC953586 | KY754162<br>USNM 568611 |
| <i>Tachyoryctes akoliae</i>        | MF110553<br>RA          | —        | —                       | —                      | MF097949 | KY754163                |
| <i>Tachyoryctes audax</i>          | MF110554<br>FMNH 190310 | —        | MF074938<br>FMNH 190310 | —                      | —        | KY754164<br>FMNH 190310 |
| <i>Tachyoryctes ruandae</i>        | —                       | —        | MF074939<br>FMNH 157817 | —                      | —        | —                       |
| <i>Tachyoryctes splendens</i>      | —                       | KC953222 | AY294900                | AY326112               | —        | AF160602                |
| <i>Tapecomys primus</i>            | —                       | —        | —                       | —                      | —        | AF159288                |
| <i>Tapecomys wolffsohni</i>        | MF110555<br>MSB 63364   | KC953223 | KC953336                | KC953460               | AY963184 | AY956698                |

|                                |                         |          |                        |                         |                         |                         |
|--------------------------------|-------------------------|----------|------------------------|-------------------------|-------------------------|-------------------------|
| <i>Tarsomys apoensis</i>       | —                       | —        | GQ405395               | DQ191516                | —                       | DQ191491                |
| <i>Tateomys rhinogradoides</i> | MF110556<br>SAMA 65766  | —        | —                      | —                       | —                       | —                       |
| <i>Tatera indica</i>           | —                       | —        | —                      | —                       | —                       | AJ430563                |
| <i>Taterillus arenarius</i>    | —                       | —        | —                      | FN357288                | —                       | AJ851261                |
| <i>Taterillus emini</i>        | KR08900                 | KC953224 | DQ019050               | KC953461                | DQ023453                | —                       |
| <i>Taterillus gracilis</i>     | —                       | —        | —                      | —                       | —                       | AJ851263                |
| <i>Taterillus pygargus</i>     | —                       | —        | —                      | —                       | —                       | AJ851262                |
| <i>Thallomys loringi</i>       | —                       | —        | —                      | —                       | —                       | DQ381928                |
| <i>Thallomys nigricauda</i>    | MF110557<br>CAS 28624   | —        | —                      | —                       | —                       | DQ381925                |
| <i>Thallomys paedulcus</i>     | —                       | —        | —                      | —                       | —                       | DQ381926                |
| <i>Thallomys sp.</i>           | —                       | —        | MF074940<br>CAS 28611  | —                       | MF097950<br>CAS 28611   | —                       |
| <i>Thalpomys cerradensis</i>   | —                       | —        | —                      | AY277481                | —                       | AY273915                |
| <i>Thalpomys lasiotis</i>      | —                       | —        | —                      | —                       | —                       | AY310347                |
| <i>Thaptomys nigrita</i>       | MF110558<br>MVZ 183040  | KC953225 | KC953337               | AY277482                | KC953588                | KY754165<br>MVZ 183040  |
| <i>Thomasomys andersoni</i>    | —                       | —        | —                      | —                       | —                       | DQ914643                |
| <i>Thomasomys aureus</i>       | MF110559<br>MVZ 170076  | KC953226 | KC953338               | KC953462                | KC953589                | U03540                  |
| <i>Thomasomys australis</i>    | —                       | —        | —                      | —                       | —                       | DQ914645                |
| <i>Thomasomys baeops</i>       | MF110560<br>AMNH 268146 | —        | —                      | MF097808<br>AMNH 268146 | MF097951<br>AMNH 268146 | DQ914654                |
| <i>Thomasomys caudivarius</i>  | MF110561<br>MSB 70717   | KC953227 | KC953339               | KC953463                | KC953590                | DQ914648                |
| <i>Thomasomys cinnamomeus</i>  | —                       | —        | —                      | —                       | —                       | DQ914646                |
| <i>Thomasomys daphne</i> LAC   | —                       | —        | —                      | —                       | —                       | KY754166<br>LAC 104     |
| <i>Thomasomys daphne</i> Puno  | MF110562<br>MVZ 171501  | —        | MF074941<br>MVZ 171501 | MF097809<br>MVZ 171501  | —                       | KY754167<br>MVZ 171501  |
| <i>Thomasomys erro</i>         | —                       | —        | —                      | —                       | —                       | EU579476                |
| <i>Thomasomys gracilis</i>     | —                       | —        | —                      | MF097810<br>MVZ 166669  | —                       | AF108674                |
| <i>Thomasomys ischyryus</i>    | —                       | —        | —                      | AY277484                | —                       | AF108675                |
| <i>Thomasomys kalinowskii</i>  | —                       | —        | —                      | —                       | —                       | AF108678                |
| <i>Thomasomys ladewi</i>       | —                       | —        | —                      | —                       | —                       | DQ914647                |
| <i>Thomasomys macrotis</i>     | MF110563<br>LSUMZ 27287 | —        | —                      | —                       | —                       | KY754168<br>LSUMZ 27287 |
| <i>Thomasomys notatus</i>      | MF110564                | —        | KC953340               | KC953464                | KC953591                | AF108676                |



|                                          |                                       |           |                         |                         |                         |                         |
|------------------------------------------|---------------------------------------|-----------|-------------------------|-------------------------|-------------------------|-------------------------|
| <i>Thomasomys onkiro</i>                 | MVZ 166706<br>MF110565<br>USNM 582124 | —         | MF074942<br>USNM 582124 | —                       | MF097952<br>USNM 582124 | KY754169<br>USNM 582124 |
| <i>Thomasomys oreas</i>                  | —                                     | —         | —                       | —                       | —                       | DQ914651                |
| <i>Thomasomys paramorum</i>              | MF110566<br>TK 104764                 | —         | MF074943<br>TK 104764   | MF097811<br>TK 104764   | MF097953<br>TK 104764   | —                       |
| <i>Thomasomys</i> sp. 1                  | —                                     | —         | —                       | —                       | —                       | AF108677                |
| <i>Thomasomys</i> sp. 2                  | —                                     | —         | —                       | —                       | —                       | DQ914653                |
| <i>Tokudaia muenninki</i>                | —                                     | —         | —                       | AB548697                | AB548692                | AB548693                |
| <i>Tokudaia osimensis</i>                | EU349640                              | EU349659  | EU349828                | EU349874                | EU349918                | AB033703                |
| <i>Tokudaia tokunoshimensis</i>          | —                                     | —         | —                       | AB548698                | —                       | AB548693                |
| <i>Tonkinomys daovantieni</i>            | —                                     | —         | MF074944<br>AMNH 275712 | —                       | MF097954<br>AMNH 275712 | KY754170<br>AMNH 275712 |
| <i>Transandinomys bolivaris</i>          | —                                     | —         | —                       | EU649073                | —                       | EU579513                |
| <i>Transandinomys bombycinus</i>         | —                                     | —         | —                       | MF097812<br>LSUMZ 26352 | MF097955<br>LSUMZ 26352 | KY754171<br>LSUMZ 26352 |
| <i>Transandinomys talamancae</i>         | —                                     | KC953228  | KC953341                | KC953465                | KC953592                | KY754172<br>MSB 91815   |
| <i>Tscherskia triton</i>                 | —                                     | —         | —                       | —                       | MF097956<br>UWBM 77335  | KY754173<br>UWBM 77335  |
| <i>Tylomys nudicaudus</i><br>El Salvador | —                                     | CN 103590 | AY294933                | AY163643                | KC953593                | KY754174<br>F 35721     |
| <i>Tylomys nudicaudus</i> Guatemala      | —                                     | —         | —                       | —                       | —                       | DQ179812                |
| <i>Tylomys watsoni</i>                   | MF110567<br>USNM 464885               | —         | —                       | KC953466                | KC953594                | KY754175<br>USNM 464885 |
| <i>Typhlomys cinereus</i>                | —                                     | —         | GQ272603                | GQ272606                | —                       | —                       |
| <i>Uranomys ruddi</i>                    | DQ023417                              | EU349642  | DQ019051                | EU360812                | DQ023454                | HM635858                |
| <i>Uromys caudimaculatus</i>             | DQ023439                              | —         | DQ019079                | EU349875                | MF097957<br>MVZ 193100  | KY754176<br>MVZ 193100  |
| <i>Uromys hadrourus</i>                  | JN114353                              | —         | —                       | —                       | —                       | —                       |
| <i>Vandeleuria oleracea</i>              | EU349641                              | EU349655  | EU349829                | MF097813                | EU349919                | KY754177                |
| <i>Voalavo gymnocaudus</i>               | —                                     | —         | GQ272604                | AY326114                | —                       | AF160596                |
| <i>Volemys millicens</i>                 | —                                     | —         | GQ374480                | JF906135                | —                       | —                       |
| <i>Volemys musseri</i>                   | MF110568<br>UWBM 75266                | —         | GQ374483                | JF906128                | —                       | KY754178<br>UWBM 75266  |
| <i>Wiedomys pyrrhorhinos</i>             | MF110569<br>UFMG 1912                 | —         | KC953342                | AY277485                | KC953595                | AY275134                |
| <i>Xenomys nelsoni</i>                   | MF110570<br>TK 28546                  | KC953229  | KC953343                | MF097814<br>TK 28546    | MF097958<br>TK 28546    | KY754179<br>TK 28546    |
| <i>Xeromys myoides</i>                   | DQ070380                              | EU349696  | EU349830                | EU349877                | EU349920                | EU349790                |

|                                |                         |          |          |                        |                         |                         |
|--------------------------------|-------------------------|----------|----------|------------------------|-------------------------|-------------------------|
| <i>Zapus princeps</i>          | MF110571<br>FMNH 163053 | —        | AF332041 | AF297287               | MF097959<br>FMNH 145965 | KY754180<br>FMNH 163053 |
| <i>Zelotomys hildegardae</i>   | MF110572<br>CM 102659   | EU349661 | DQ019080 | DQ022396               | DQ023476                | KY754181<br>CM 102661   |
| <i>Zygodontomys brevicauda</i> | MF110573<br>AMCC 113004 | KC953230 | KC953344 | JF906128               | KC953596                | KY754182<br>AMCC 113004 |
| <i>Zygodontomys cherriei</i>   | —                       | —        | —        | AY163646               | —                       | EU579520                |
| <i>Zygodontomys microtinus</i> | —                       | —        | —        | —                      | —                       | EU652764                |
| <i>Zygodontomys</i> sp. 1      | —                       | —        | —        | —                      | —                       | EU652750                |
| <i>Zygodontomys</i> sp. 2      | —                       | —        | —        | —                      | —                       | EU652758                |
| <i>Zyzomys argurus</i>         | DQ070381                | —        | EU349685 | MF097815<br>SAMA 07908 | EU349831                | KY754183<br>SAMA 07908  |

---

GenBank sequences indicated with GenBank accession numbers (e.g., “EU652764”) that lack spaces between letters and numbers. Newly determined sequences are referenced by GenBank accessions and followed by museum vouchers (e.g., “FMNH 145965”) or collector numbers, that have spaces between acronyms and numbers. Abbreviations for museums and collectors are as follows: The Ambrose Monell Collection for Molecular and Microbial Research, American Museum of Natural History, AMCC; Angelo State Natural History Collection, ASNHC; California Academy of Sciences, CAS; Carnegie Museum of Natural History, CM; Universidad Nacional Autónoma de México, CNMA; Field Museum of Natural History, FMNH; Louisiana State University Museum of Natural History, LSUMZ; Museum of Southwestern Biology, MSB; Museum of Vertebrate Zoology, Berkeley, MVZ; Sam Noble Oklahoma Museum of Natural History, OMNHN; Royal Ontario Museum, ROM; Southwestern Australian Museum, SAMA; Texas Tech University, TK; Universidade Federal de Minas Gerais, UFMG; University of Kansas Natural History Museum and Biodiversity Research Center, UK; Museo de Historia Natural, Peru, UNSM; United States National Museum, USNM; University of Washington, Burke Museum, UWBM. CN is the tissue accession prefix for the Royal Ontario Museum. NK is the tissue accession prefix for the Museum of Southwestern Biology. AK refers to specimens catalogued at the Texas Cooperative Wildlife Collection. JSB refers to uncatalogued specimens housed at Texas Tech, and collector numbers H refer to uncatalogued specimens housed in the Texas Cooperative Wildlife Collections and collected by members of the laboratory of Dr. Rodney Honeycutt. JM refers to specimens collected by J. Miller (ROM). ORB refers to collections of Oswaldo Ramirez-Baca. RA and F refer to uncatalogued specimens from the collections of Ronald Adkins. SP refers to specimens catalogued at Carnegie Museum of Natural History. MOR refers to specimens collected from the Omaha Henry Doorly Zoo and Aquarium. PY refers to specimens collected by Ulysses Pardiñas. VPT refers to specimens collected by Victor Pacheco Torres. EPU and LB refers to specimens housed at Centro Nacional Patagonico, Argentina. RH and MAW are accessions associated with the University of Memphis. All available collecting locality information for new sequences can be found on GenBank.
