# Supplementary material for: Muroid rodent phylogenetics: 900-species tree reveals increasing diversification rates
Source: PubMed Central journal article supplement (PMC5559066; doi:10.1371/journal.pone.0183070), 2017-08-16
Supplement: pone.0183070.s004.pdf [file pone.0183070.s004.pdf]

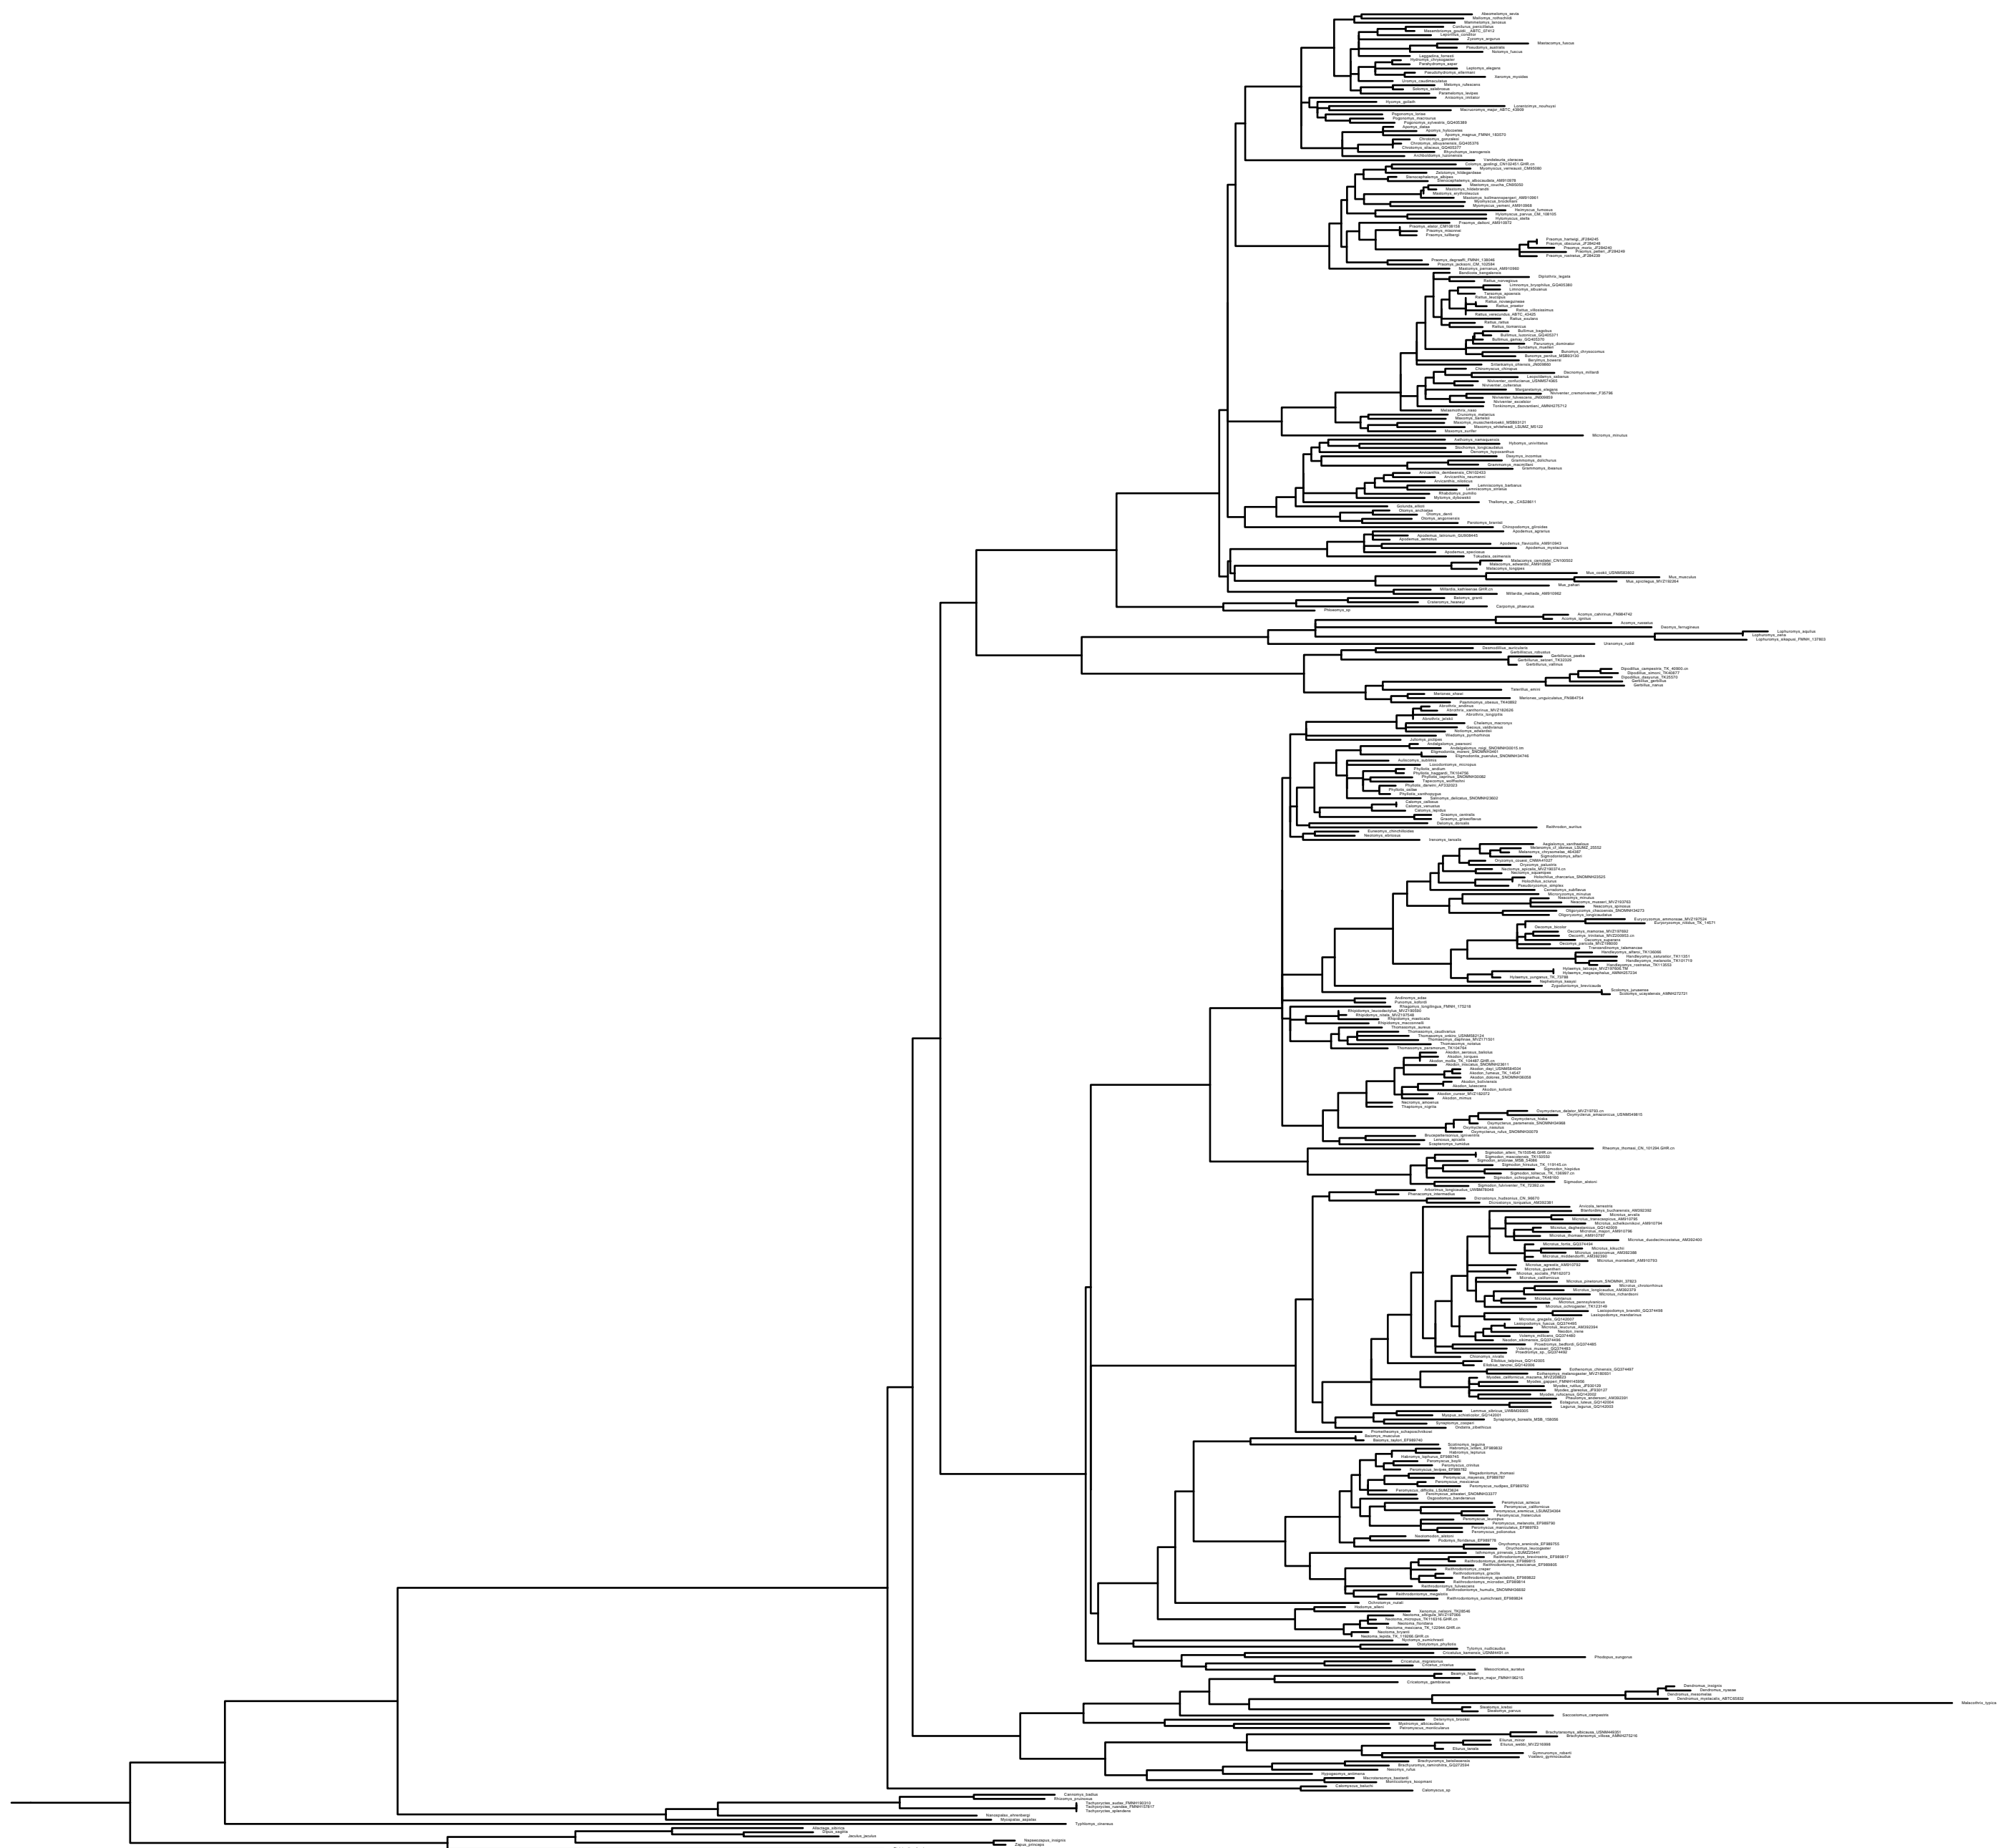

0.04
